# Supplementary material for: Cryptotephra from the Icelandic Veiðivötn 1477 CE eruption in a Greenland ice core: confirming the dating of volcanic events in the 1450s CE and assessing the eruption's climatic impact
Source: Copernicus journal article supplement (doi:10.5194/cp-17-565-2021), 2021-03-04
Supplement: Supplementary file 1 [file cp-17-565-2021-supplement.zip]

Archive with 5 entries (5 files):
- cp-17-565-2021-supplement-title-page.pdf
- Figure S1.pdf
- Figure S2.pdf
- Figure S3.pdf
- Supplementary Data Tables S1-S10.xlsx
