# Supplementary material for: Cryptotephra from the Icelandic Veiðivötn 1477 CE eruption in a Greenland ice core: confirming the dating of volcanic events in the 1450s CE and assessing the eruption's climatic impact
Source: Copernicus journal article supplement (doi:10.5194/cp-17-565-2021), 2021-03-04
Supplement: Supplementary file 1 [file cp-17-565-2021-supplement.zip › cp-17-565-2021-supplement-title-page.pdf]

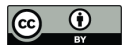

## *Supplement of*

# **Cryptotephra from the Icelandic Veiðivötn 1477 CE eruption in a Greenland ice core: confirming the dating of volcanic events in the 1450s CE and assessing the eruption's climatic impact**

**Peter M. Abbott et al.**

*Correspondence to:* Peter M. Abbott ([peter.abbott@climate.unibe.ch](mailto:peter.abbott@climate.unibe.ch))

- [cp-17-565-2021-supplement-title-page.pdf](#)
- [Figure S1.pdf](#)
- [Figure S2.pdf](#)
- [Figure S3.pdf](#)
- [Supplementary Data Tables S1-S10.xlsx](#)

The copyright of individual parts of the supplement might differ from the CC BY 4.0 License.
