# Supplementary material for: Cryptotephra from the Icelandic Veiðivötn 1477 CE eruption in a Greenland ice core: confirming the dating of volcanic events in the 1450s CE and assessing the eruption's climatic impact
Source: Copernicus journal article supplement (doi:10.5194/cp-17-565-2021), 2021-03-04
Supplement: Supplementary file 1 [file cp-17-565-2021-supplement.zip › Figure S1.pdf]

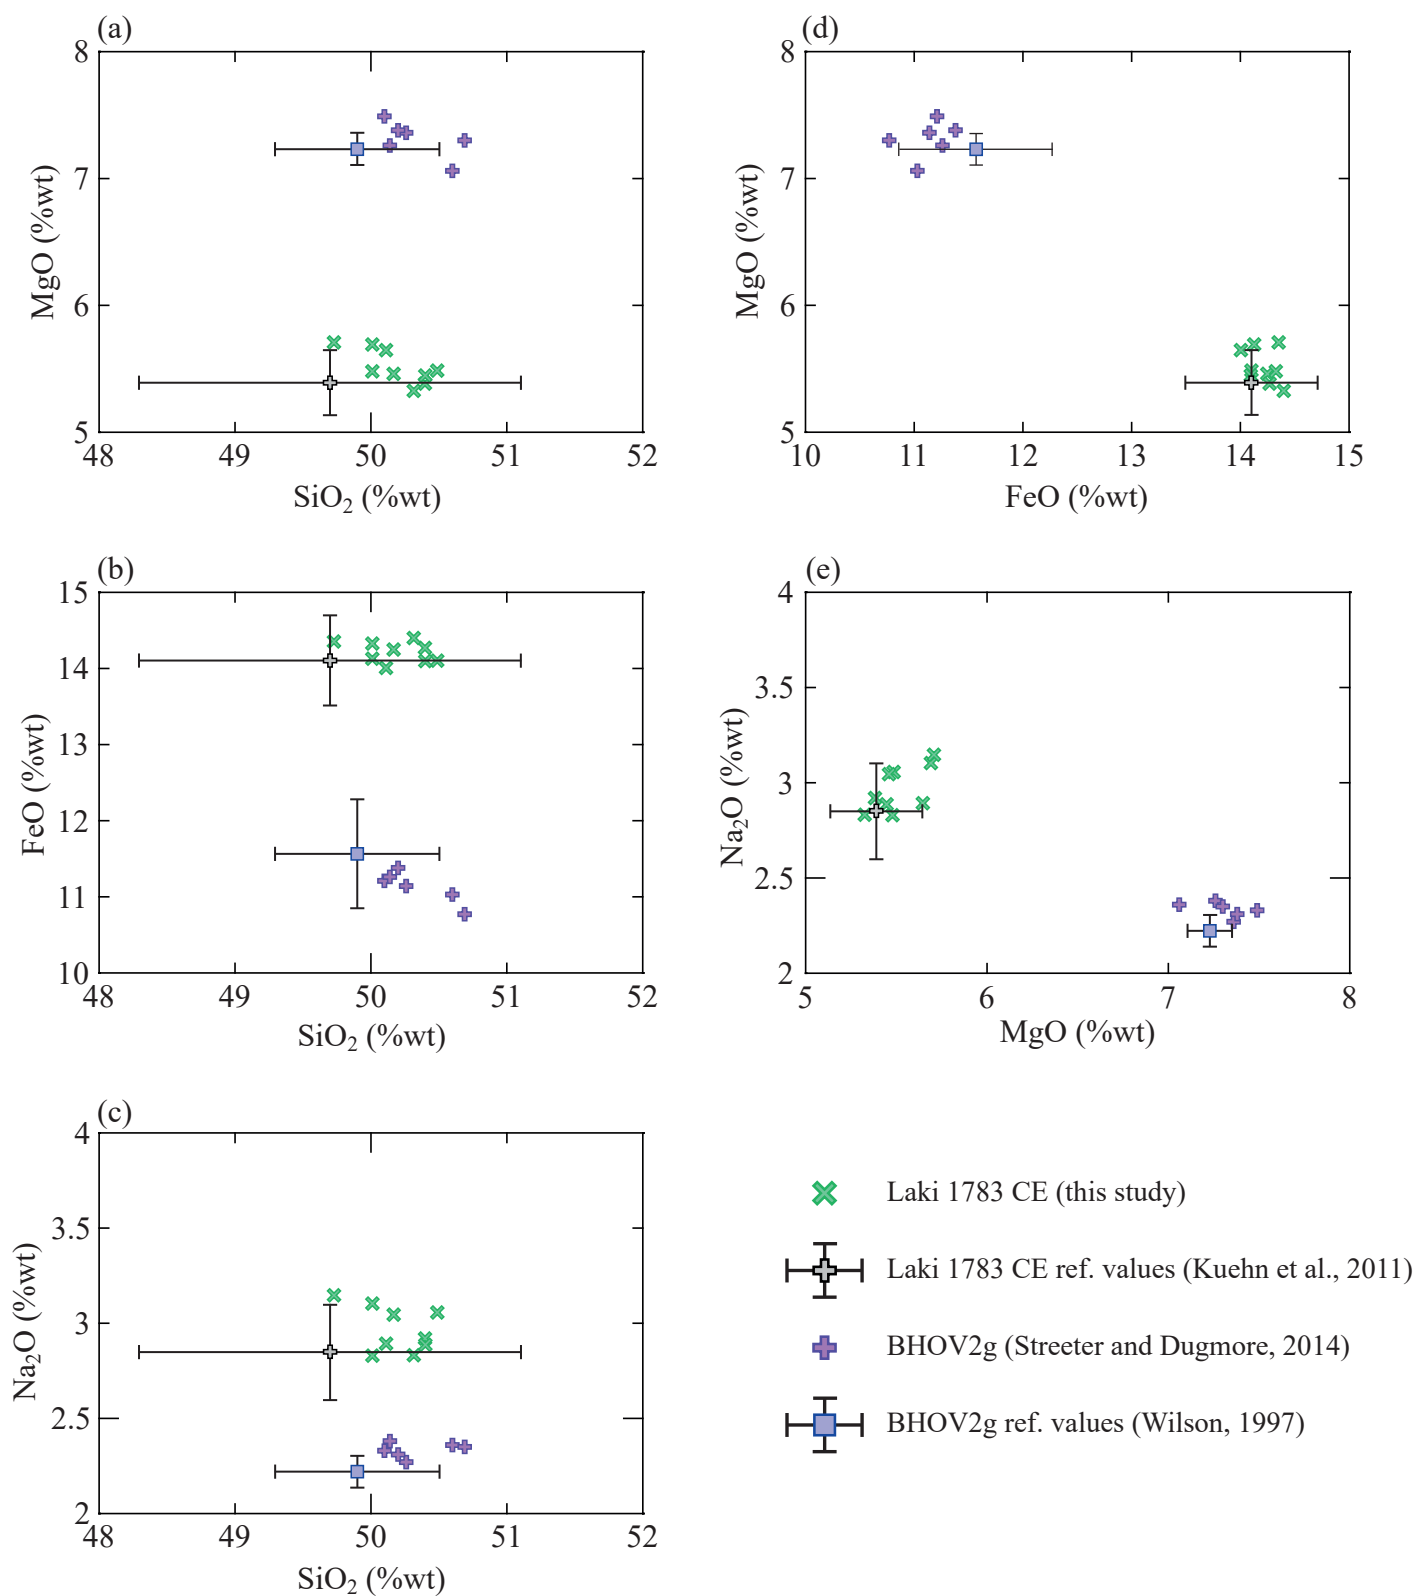

**Figure S1:** Comparison of secondary standard data measured during the analytical periods when tephra shards from TUNU2013 78.655 m were measured for this study and when glass shards from the V1477 deposit from Skaftártunga were measured for Streeter and Dugmore (2014).
