# Supplementary material for: Cryptotephra from the Icelandic Veiðivötn 1477 CE eruption in a Greenland ice core: confirming the dating of volcanic events in the 1450s CE and assessing the eruption's climatic impact
Source: Copernicus journal article supplement (doi:10.5194/cp-17-565-2021), 2021-03-04
Supplement: Supplementary file 1 [file cp-17-565-2021-supplement.zip › Figure S2.pdf]

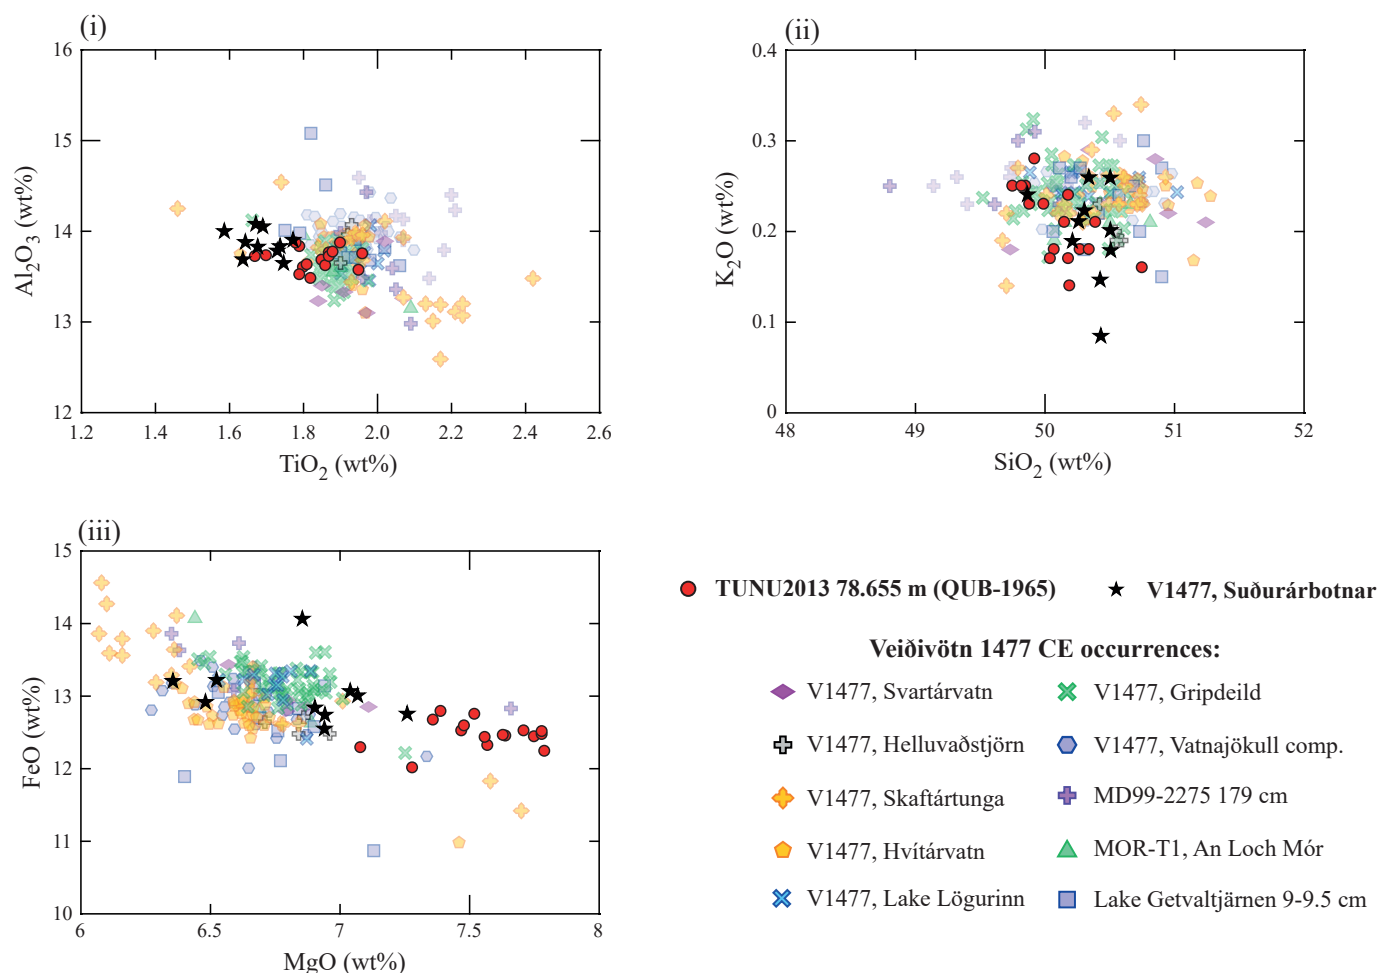

**Figure S2:** Geochemical comparison of glass tephra shards from the TUNU2013 78.655 m deposit, analyses of Veiðivötn 1477 CE occurrences and the QUB Veiðivötn internal standard of V1477 from Suðurárbotnar, North Iceland (G. Larsen, pers. comm., 2020). (i-iii) Comparisons of individual analyses from the geochemical characterisation of TUNU2013 78.655 m to characterisations of several Icelandic and non-Icelandic occurrences of the Veiðivötn 1477 CE eruption. Geochemical data for V1477 occurrences from Svartárvatn (Larsen et al., 2002), Helluvaðstjörn (Lawson et al., 2007), Skaftártunga (Streeter and Dugmore, 2014), Hvítárvatn (Larsen et al., 2011), Lake Lögurinn (Gudmundsdóttir et al., 2016), Gripdeild (Bergþórsdóttir, 2014), a compilation of six sites around the Vatnajökull ice cap (Óladóttir et al., 2011), MD99-2275 (Larsen et al., 2002; Gudmundsdóttir et al., 2011), An Loch Mór (Chambers et al., 2004) and Lake Getvaltjärnen (Davies et al., 2007). All data provided in supplementary information and plotted on a normalised anhydrous basis.
