# Supplementary material for: Cryptotephra from the Icelandic Veiðivötn 1477 CE eruption in a Greenland ice core: confirming the dating of volcanic events in the 1450s CE and assessing the eruption's climatic impact
Source: Copernicus journal article supplement (doi:10.5194/cp-17-565-2021), 2021-03-04
Supplement: Supplementary file 1 [file cp-17-565-2021-supplement.zip › Figure S3.pdf]

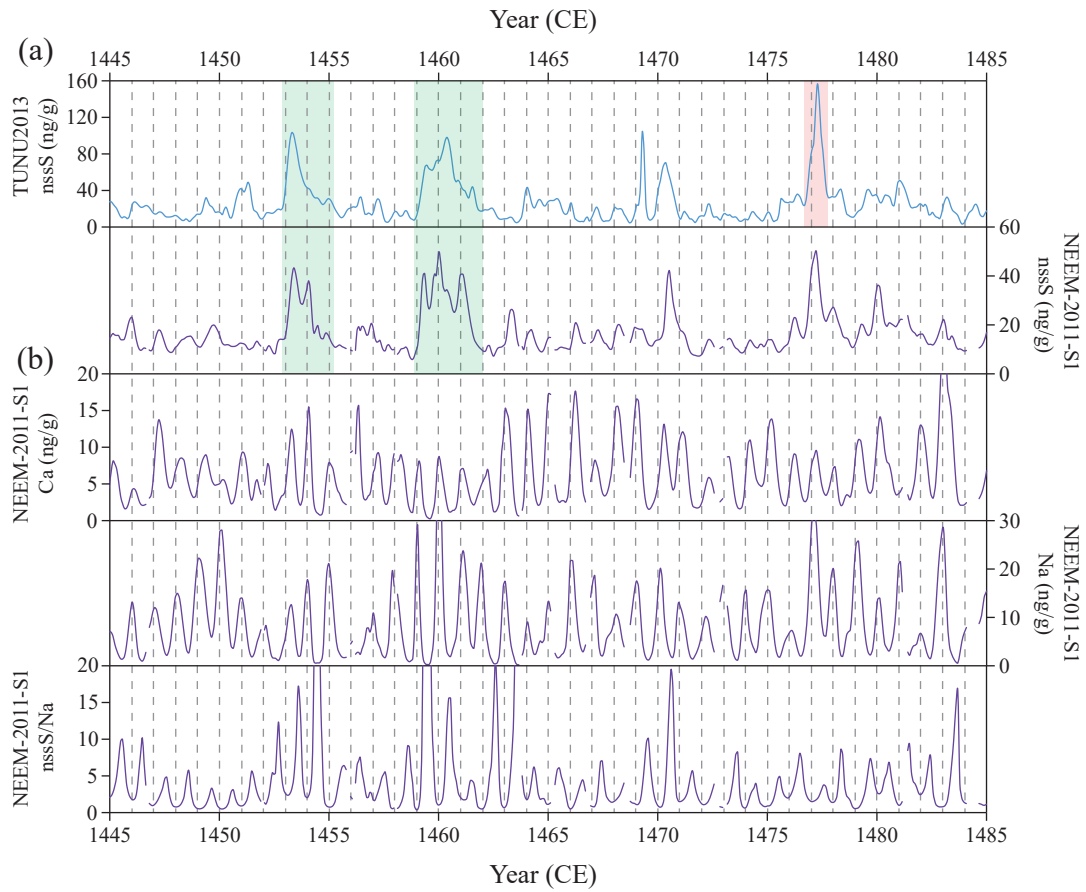

**Figure S3:** (a) Synchronisation of nssS concentrations from TUNU2013 and NEEM-2011-S1 between 1445-1485 CE. Red shaded bar indicates the location of the V1477 tephra layer in the TUNU2013 record. Green shaded bars indicate the two 1450s CE sulphate peaks present in both cores. (b) High-resolution nssS and annual layer dating of the NEEM-2011-S1 ice-core between 1445-1485 CE using a multiparameter approach. Concentration records are shown for nssS, Ca, Na and nssS/Na with grey dashed lines indicating the assigned years. Data for NEEM-2011-S1 from Sigl et al. (2015).
