# Supplementary material for: Cryptotephra from the Icelandic Veiðivötn 1477 CE eruption in a Greenland ice core: confirming the dating of volcanic events in the 1450s CE and assessing the eruption's climatic impact
Source: Copernicus journal article supplement (doi:10.5194/cp-17-565-2021), 2021-03-04
Supplement: Supplementary file 1 [file Supplementary Data Tables S1-S10.xlsx]

## Sheet: Table S1 - TUNU 78.655 m Data
	Table S1a: Unnormalised major oxide concentrations of glass tephra shards from the TUNU2013 78.655 m tephra deposit (sample number QUB-1965). n = shard number. All oxides are presented as weight %. The operating conditions outlined in Coulter et al. (2010) were utilised with Cl and P additionally measured using EDS and WDS respectively.														Table S1b: Normalised major oxide concentrations of glass tephra shards from the TUNU2013 78.655 m tephra deposit (sample number QUB-1965). The minor elements MnO, P2O5 and Cl have been excluded to faciliate comparisons to other geochemical datasets. n = shard number. All oxides are presented as weight %. The operating conditions outlined in Coulter et al. (2010) were utilised with Cl and P addit…
	TUNU2013 78.655 m (QUB-1965)														TUNU2013 78.655 m (QUB-1965)
	n	SiO2	TiO2	Al2O3	FeO	MnO	MgO	CaO	Na2O	K2O	P2O5	Cl	Total Oxides		n	SiO2	TiO2	Al2O3	FeO	MgO	CaO	Na2O	K2O	Total Oxides
	1	48.59	1.82	13.28	11.5	0.18	6.97	10.53	2.91	0.15	0.31	0.04	96.29		1	50.7467	1.90078	13.8695	12.0104	7.27937	10.9974	3.03916	0.156658	100
	2	47.59	1.72	12.76	11.78	0.03	7.34	10.83	2.48	0.17	0.18	0.04	94.92		2	50.2694	1.81684	13.4784	12.4432	7.75325	11.4397	2.61963	0.179571	100
	3	48.01	1.59	13.07	12.07	0.29	7.01	10.59	2.73	0.2	0.19	0.07	95.84		3	50.3936	1.66894	13.7189	12.6693	7.35804	11.1158	2.86554	0.20993	100
	4	47.9	1.62	13.07	11.72	0.35	7.2	10.61	2.87	0.17	0.14	0.09	95.75		4	50.3363	1.7024	13.7348	12.3161	7.5662	11.1496	3.01597	0.178646	100
	5	47.28	1.69	13.03	11.8	0.03	7.04	10.6	2.62	0.16	0.24	0.04	94.52		5	50.1804	1.79367	13.8293	12.5239	7.47187	11.2503	2.78073	0.169815	100
	6	47.81	1.76	13.03	11.84	0.14	7.2	10.92	2.49	0.23	0.22	0.09	95.74		6	50.1784	1.84719	13.6755	12.4265	7.55668	11.461	2.61335	0.241394	100
	7	47.46	1.7	12.86	11.58	0.17	7.37	10.79	2.68	0.13	0.22	0.08	95.05		7	50.185	1.79761	13.5984	12.2449	7.79317	11.4095	2.83388	0.137464	100
	8	47.32	1.68	13.09	11.75	0.21	7.21	10.52	2.59	0.2	0.15	0.05	94.77		8	50.1484	1.78042	13.8724	12.4523	7.64095	11.1488	2.74481	0.211954	100
	9	47.85	1.87	13.14	11.74	0.25	6.77	11.09	2.93	0.17	0.18	0.04	96.04		9	50.0733	1.95689	13.7505	12.2855	7.08455	11.6053	3.06614	0.177899	100
	10	47.64	1.77	12.97	11.99	0.12	7.12	10.6	2.95	0.16	0.21	0.07	95.62		10	50.042	1.85924	13.6239	12.5945	7.47899	11.1345	3.09874	0.168067	100
	11	46.83	1.7	12.79	11.7	0.08	7.3	10.51	2.72	0.26	0.07	0.12	94.07		11	49.9201	1.81217	13.6339	12.472	7.78169	11.2035	2.89948	0.277156	100
	12	47.29	1.77	13.04	12.09	0.03	7.13	10.56	2.7	0.22	0.13	0.05	95.03		12	49.884	1.86709	13.7553	12.7532	7.5211	11.1392	2.8481	0.232068	100
	13	46.82	1.68	12.66	11.72	0.16	7.29	10.36	2.91	0.22	0.33	0.06	94.21		13	49.9893	1.79372	13.517	12.5133	7.78347	11.0613	3.10698	0.234892	100
	14	47.7	1.79	13.15	12	0.13	7.39	10.72	2.88	0.24	0.23	0	96.24		14	49.7549	1.86711	13.7165	12.517	7.70836	11.1818	3.00407	0.250339	100
	15	47.39	1.79	13.09	11.85	0.34	7.25	10.52	2.94	0.24	0.27	0.03	95.7		15	49.8475	1.88282	13.7688	12.4645	7.62596	11.0655	3.09246	0.252446	100
	16	47.3	1.85	12.88	12.14	0.33	7.02	10.75	2.76	0.24	0.31	0.11	95.69		16	49.8209	1.9486	13.5665	12.787	7.39414	11.3229	2.9071	0.252791	100

## Sheet: Table S2 - Sec. Stand. Analyses
	Table S2a: (i) Raw and (ii) normalised secondary standard analyses of the rhyolitic Lipari obsidian made during the analytical period when the TUNU2013 78.655 m (QUB-1965) tephra sample was analysed. (iii) Reference values from Kuehn et al. (2011).														Table S2b: (i) Raw and (ii) normalised secondary standard analyses of the basaltic Laki AD 1783 tephra made during the analytical period when the TUNU2013 78.655 m (QUB-1965) tephra sample was analysed. (iii) Reference values from Kuehn et al. (2011).														Table S2c: (i) Raw and (ii) normalised analyses of the QUB Veiðivötn internal standard of V1477 from Suðurárbotnar, North Iceland (G. Larsen, pers. comm., 2020), analysed during the sample analytical period as the TUNU 78.655 m tephra shards. The minor elements MnO, P2O5 and Cl have been excluded from the normalised analyses to faciliate comparisons to other geochemical datasets.
	(i) Raw analyses of the Lipari obsidian														(i) Raw analyses of the Laki AD 1783 tephra														(i) Raw analyses of the QUB Veiðivötn internal standard
	n	SiO2	TiO2	Al2O3	FeO	MnO	MgO	CaO	Na2O	K2O	P2O5	Cl	Total Oxides		n	SiO2	TiO2	Al2O3	FeO	MnO	MgO	CaO	Na2O	K2O	P2O5	Cl	Total Oxides		n	SiO2	TiO2	Al2O3	FeO	MnO	MgO	CaO	Na2O	K2O	P2O5	Cl	Total Oxides
	1	71.59	0.05	12.61	1.52	0.2	0.05	0.69	3.57	4.81	0.14	0.2975	95.5275		1	47.58	2.73	12.45	13.29	0.18	5.17	9.15	2.88	0.42	0.35	0.04	94.24		1	50.1033	1.66391	14.0141	13.1459	0.186027	6.32493	11.141	2.88342	0.258371	0.258371	0.0206697	96.76
	2	71.55	0.12	12.67	1.44	0.02	0.07	0.74	3.71	4.92	0.12	0.289	95.649		2	47.54	2.75	12.57	13.43	0.35	5.41	9.26	2.95	0.41	0.34	0.05	95.06		2	50.3046	1.72269	13.729	12.5	0.178571	6.91176	11.5336	2.73109	0.178571	0.178571	0.0420168	95.2
	3	70.16	0.05	12.29	1.45	-0.03	0.05	0.63	3.82	4.84	0.09	0.3485	93.6985		3	47.78	2.78	12.68	13.57	0.22	5.2	9.33	2.9	0.36	0.39	0.03	95.24		3	50.2751	1.6716	13.7854	12.7169	0.0952179	7.23656	11.3627	2.53915	0.0846382	0.158697	0.0528989	94.52
	4	70.04	0.03	12.5	1.52	0.09	0.03	0.64	3.96	4.86	0.03	0.2975	93.9975		4	47.57	2.92	12.63	13.73	0.28	5.46	9.26	3.01	0.45	0.33	0.03	95.66		4	49.979	1.68103	13.9735	12.6707	0.315192	6.90271	11.2524	2.7842	0.210128	0.14709	0.0945577	95.18
															5	47.47	2.91	12.32	13.44	0.09	5.07	9.24	2.75	0.41	0.4	0.06	94.19		5	50.1059	1.63032	13.6354	12.9579	0.158797	7.04002	11.4122	2.59369	0.222316	0.17997	0.0529325	94.46
															6	47.37	3.16	12.33	13.57	0.2	5.19	9.29	2.68	0.4	0.44	0.09	94.72		6	50.1617	1.7628	13.8312	12.8507	0.250339	6.44623	11.7138	2.56597	0.146031	0.229477	0.0417232	95.87
															7	47.3	3.09	12.19	13.22	0.38	5.33	9.37	2.73	0.38	0.32	0.09	94.39		7	50.258	1.57895	13.9319	13.1579	0.299278	6.49123	11.1249	2.72446	0.257998	0.134159	0.0515996	96.9
															8	47.8	3.22	12.08	13.68	0.23	5.06	9.37	2.69	0.41	0.41	0.06	95		8	49.9791	1.73858	13.584	13.008	0.136154	7.0067	11.2065	2.82782	0.188521	0.240888	0.0837872	95.48
															9	47.84	2.89	12.53	13.38	0.17	5.17	9.48	2.74	0.43	0.27	0.03	94.92		9	49.6251	1.72881	13.768	13.9971	0.177046	6.8215	11.1227	2.21829	0.239533	0.239533	0.062487	96.02
																													10	50.2638	1.63571	13.8138	12.7797	0.147742	6.86999	11.1967	2.75433	0.200507	0.232165	0.0949768	94.76
	(ii) Normalised analyses of the Lipari obsidian														(ii) Normalised analyses of the Laki 1783 CE tephra
																													(ii) Analyses, normalised for comparison, of the QUB Veiðivötn internal standard
	n	SiO2	TiO2	Al2O3	FeO	MnO	MgO	CaO	Na2O	K2O	P2O5	Cl	Total Oxides		n	SiO2	TiO2	Al2O3	FeO	MnO	MgO	CaO	Na2O	K2O	P2O5	Cl	Total Oxides
	1	74.9418	0.0523409	13.2004	1.59116	0.209364	0.0523409	0.722305	3.73714	5.0352	0.146555	0.311429	95.58		1	50.4881	2.89686	13.211	14.1023	0.191002	5.48599	9.70925	3.05603	0.445671	0.371392	0.0424448	94.24		n	SiO2	TiO2	Al2O3	FeO	MgO	CaO	Na2O	K2O	Total Oxides
	2	74.8048	0.125459	13.2463	1.5055	0.0209098	0.0731842	0.773662	3.87877	5.14381	0.125459	0.302146	95.69		2	50.0105	2.89291	13.2232	14.1279	0.368189	5.69114	9.74122	3.1033	0.431307	0.357669	0.0525984	95.06		1	50.3375	1.67169	14.0795	13.2074	6.35448	11.193	2.8969	0.259578	100
	3	74.8785	0.0533626	13.1165	1.54752	-0.0320176	0.0533626	0.672369	4.07691	5.1655	0.0960528	0.371938	93.77		3	50.168	2.91894	13.3137	14.2482	0.230995	5.45989	9.7963	3.04494	0.377992	0.409492	0.0314994	95.24		2	50.5062	1.72959	13.784	12.5501	6.93946	11.5798	2.74204	0.179287	100
	4	74.5126	0.0319157	13.2982	1.61706	0.0957472	0.0319157	0.680869	4.21288	5.17035	0.0319157	0.316498	94.07		4	49.7282	3.05248	13.203	14.3529	0.292703	5.70771	9.68012	3.14656	0.470416	0.344972	0.0313611	95.66		3	50.4298	1.67675	13.8279	12.756	7.25883	11.3976	2.54696	0.0848987	100
															5	50.3981	3.0895	13.0799	14.269	0.0955515	5.38274	9.80996	2.91963	0.43529	0.424674	0.063701	94.19		4	50.2588	1.69044	14.0518	12.7417	6.94136	11.3154	2.79979	0.211305	100
															6	50.0106	3.33615	13.0173	14.3264	0.211149	5.47931	9.80785	2.82939	0.422297	0.464527	0.0950169	94.72		5	50.3029	1.63673	13.689	13.0088	7.0677	11.4571	2.60389	0.223191	100
															7	50.1112	3.27365	12.9145	14.0057	0.402585	5.64678	9.9269	2.89226	0.402585	0.339019	0.0953491	94.39		6	50.4247	1.77205	13.9037	12.9181	6.48003	11.7752	2.57943	0.146797	100
															8	50.3158	3.38947	12.7158	14.4	0.242105	5.32632	9.86316	2.83158	0.431579	0.431579	0.0631579	95		7	50.503	1.58664	13.9998	13.222	6.52287	11.1791	2.73774	0.259255	100
															9	50.4003	3.04467	13.2006	14.0961	0.179098	5.44669	9.98736	2.88664	0.453013	0.28445	0.0316056	94.92		8	50.2104	1.74663	13.6469	13.0682	7.03914	11.2584	2.84091	0.189394	100
																													9	49.864	1.73713	13.8342	14.0645	6.85433	11.1762	2.22897	0.240686	100
	(iii) Reference values for the Lipari obsidian														(iii) Reference values for the Laki 1783 CE tephra														10	50.5037	1.64352	13.8798	12.8406	6.90277	11.2501	2.76747	0.201463	100
		SiO2	TiO2	Al2O3	FeO	MnO	MgO	CaO	Na2O	K2O	P2O5	Cl	Total Oxides			SiO2	TiO2	Al2O3	FeO	MnO	MgO	CaO	Na2O	K2O	P2O5	Cl	Total Oxides
	Average	74.1	0.074	13.1	1.55	0.065	0.041	0.73	4.07	5.11	0.01	0.34	100.03		Average	49.7	3.08	13	14.1	0.231	5.39	9.7	2.85	0.46	0.345	0.046	99.09
	St. dev.	1.4	0.02	0.5	0.05	0.031	0.022	0.06	0.22	0.27	0.02	0.05			St. dev.	1.4	0.22	0.5	0.6	0.101	0.25	0.38	0.25	0.04	0.053	0.042

## Sheet: Table S3 - Operating Conditions
	Table S3: Operating conditions for the JEOL FEG-SEM 6500F at Queen's University Belfast used for the analysis of the TUNU 78.655 m glass tephra shards.
	Operating Conditions
	Accelerating Voltage		15 kV
	Beam Current		5 nA
	Beam Diameter		9 µm
	Elements analysed using EDS		Si, Al, Fe, Ca, K and Cl
	Elements analysed using WDS		Na, Mg, Mn, Ti and P
	Count Times
	Si, Al, Fe, Ca, K and Cl		ED 150 s livetime
	Mg		20s (peak), 10s (background)
	Mn, Ti and P		30s (peak), 10s (background)
	Na		10s (peak), 1s (background)

## Sheet: Table S4 - V1477 Comp. Data
	Table S4a: (i-xi) Unnormalised major oxide concentrations of glass tephra shards from previously reported occurances of V1477 used for graphical and statistical comparisons. n = shard number. All oxides are presented as weight %.														Table S4b: (i-xi) Normalised major oxide concentrations of glass tephra shards from previously reported occurances of V1477 used for graphical and statistical comparisons. The minor elements MnO, P2O5 and Cl have been excluded to faciliate comparisons to other geochemical datasets. n = shard number. All oxides are presented as weight %. Total oxide values are prior to normalisation.
	(i) V1477, Svartárvatn (Larsen et al., 2002)														(i) V1477, Svartárvatn (Larsen et al., 2002)
	n	SiO2	TiO2	Al2O3	FeO	MnO	MgO	CaO	Na2O	K2O	P2O5	Cl	Total Oxides		n	SiO2	TiO2	Al2O3	FeO	MgO	CaO	Na2O	K2O	Total Oxides
	1	50.84	1.84	13.23	12.94	N/A	6.8	11.46	2.6	0.28	0.07	N/A	100.06		1	50.8451	1.84018	13.2313	12.9413	6.80068	11.4611	2.60026	0.280028	100.06
	2	50.66	1.84	13.32	12.72	N/A	6.75	11.6	2.32	0.22	0.25	N/A	99.68		2	50.9504	1.85055	13.3964	12.7929	6.7887	11.6665	2.3333	0.221261	99.68
	3	50.06	1.9	13.26	12.78	N/A	7.07	11.78	2.31	0.29	0.22	N/A	99.67		3	50.3369	1.91051	13.3333	12.8507	7.1091	11.8451	2.32278	0.291604	99.67
	4	51.06	1.96	13.05	13.38	N/A	6.55	11.42	2.01	0.21	0.17	N/A	99.81		4	51.2445	1.96708	13.0971	13.4283	6.57367	11.4613	2.01726	0.210759	99.81
	5	49.7	2.02	13.88	12.85	N/A	6.87	12.12	2.31	0.18	0.22	N/A	100.15		5	49.7348	2.02141	13.8897	12.859	6.87481	12.1285	2.31162	0.180126	100.15
	6	50.17	2.06	13.19	13.15	N/A	6.62	11.51	2.53	0.23	0.24	N/A	99.7		6	50.4424	2.07118	13.2616	13.2214	6.65594	11.5725	2.54374	0.231249	99.7
	(ii) V1477, Helluvaðstjörn (Lawson et al., 2007)														(ii) V1477, Helluvaðstjörn (Lawson et al., 2007)
	n	SiO2	TiO2	Al2O3	FeO	MnO	MgO	CaO	Na2O	K2O	P2O5	Cl	Total Oxides		n	SiO2	TiO2	Al2O3	FeO	MgO	CaO	Na2O	K2O	Total Oxides
	1	49.58	1.82	13.49	12.23	0.19	6.82	11.39	2.5	0.19	0.16	N/A	98.36		1	50.5867	1.85695	13.7639	12.4783	6.95847	11.6213	2.55076	0.193858	98.36
	2	49.37	1.86	13.33	12.19	0.18	6.68	11.41	2.63	0.19	0.14	N/A	97.98		2	50.5529	1.90457	13.6494	12.4821	6.84006	11.6834	2.69302	0.194553	97.98
	3	49.15	1.87	13.61	12.39	0.18	6.69	11.15	2.41	0.22	0.17	N/A	97.83		3	50.4206	1.91834	13.9618	12.7103	6.86295	11.4382	2.4723	0.225687	97.83
	4	48.71	1.86	13.56	12.18	0.17	6.47	11.03	2.39	0.19	0.14	N/A	96.69		4	50.5395	1.92986	14.0693	12.6375	6.71301	11.4443	2.47977	0.197136	96.69
	(iii) V1477, Skaftártunga (Streeter and Dugmore, 2014)														(iii) V1477, Skaftártunga (Streeter and Dugmore, 2014)
	n	SiO2	TiO2	Al2O3	FeO	MnO	MgO	CaO	Na2O	K2O	P2O5	Cl	Total Oxides		n	SiO2	TiO2	Al2O3	FeO	MgO	CaO	Na2O	K2O	Total Oxides
	1	50.6	2.12	13.11	13.5	0.24	6.07	11.23	2.46	0.26	0.16	N/A	99.75		1	50.9311	2.13387	13.1958	13.5883	6.10971	11.3035	2.47609	0.261701	99.75
	2	50.26	2.15	13.1	13.46	0.24	6.12	11.42	2.53	0.25	0.16	N/A	99.69		2	50.6194	2.16537	13.1937	13.5562	6.16376	11.5017	2.54809	0.251788	99.69
	3	50.15	1.94	13.52	13.13	0.22	6.27	11.07	2.48	0.23	0.17	N/A	99.2		3	50.754	1.96336	13.6828	13.2881	6.34551	11.2033	2.50987	0.23277	99.2
	4	50.13	2.14	12.44	14.38	0.25	6.01	10.81	2.55	0.34	0.17	N/A	99.21		4	50.744	2.16621	12.5924	14.5561	6.08361	10.9424	2.58123	0.344164	99.21
	5	49.75	1.89	13.18	12.82	0.24	6.53	11.17	2.49	0.24	0.15	N/A	98.46		5	50.7291	1.92719	13.4394	13.0723	6.65851	11.3898	2.539	0.244723	98.46
	6	49.69	2.17	12.85	13.51	0.24	6.04	10.9	2.59	0.23	0.17	N/A	98.39		6	50.7144	2.21474	13.1149	13.7885	6.16452	11.1247	2.6434	0.234742	98.39
	7	49.57	1.74	14.51	11.4	0.18	7.68	12.39	2.31	0.19	0.15	N/A	100.12		7	49.6743	1.74366	14.5405	11.424	7.69616	12.4161	2.31486	0.1904	100.12
	8	49.53	2.37	13.21	13.59	0.24	5.95	10.42	2.66	0.32	0.2	N/A	98.47		8	50.5253	2.41763	13.4755	13.8631	6.06957	10.6294	2.71346	0.326431	98.47
	9	49.53	2.11	12.76	13.63	0.24	6.16	11.22	2.46	0.23	0.16	N/A	98.49		9	50.4944	2.15109	13.0085	13.8954	6.27995	11.4385	2.5079	0.234479	98.49
	10	49.39	2.19	12.86	13.89	0.25	6.27	11.1	2.47	0.22	0.18	N/A	98.84		10	50.188	2.22538	13.0678	14.1144	6.3713	11.2793	2.50991	0.223555	98.84
	11	49.38	1.89	13.65	12.37	0.22	6.64	11.42	2.48	0.22	0.15	N/A	98.41		11	50.3672	1.92778	13.9229	12.6173	6.77275	11.6483	2.52958	0.224398	98.41
	12	49.33	1.85	13.53	12.3	0.22	6.61	11.28	2.41	0.22	0.16	N/A	97.93		12	50.5689	1.89646	13.8698	12.6089	6.77601	11.5633	2.47053	0.225525	97.93
	13	49.26	2.01	12.92	13.28	0.23	6.19	11	2.42	0.25	0.16	N/A	97.72		13	50.6113	2.06514	13.2744	13.6443	6.35981	11.3018	2.48639	0.256858	97.72
	14	49.19	1.81	13.57	12.39	0.23	6.72	11.89	2.39	0.22	0.15	N/A	98.57		14	50.0968	1.84336	13.8201	12.6184	6.84387	12.1092	2.43406	0.224055	98.57
	15	49.12	1.9	13.69	12.61	0.24	6.5	11.43	2.45	0.23	0.16	N/A	98.34		15	50.1532	1.93996	13.9779	12.8752	6.63672	11.6704	2.50153	0.234838	98.34
	16	49.05	2.02	13.59	12.86	0.24	6.13	11.15	2.51	0.2	0.15	N/A	97.92		16	50.2922	2.07116	13.9342	13.1857	6.28525	11.4324	2.57357	0.205065	97.92
	17	48.9	1.92	13.65	12.72	0.22	6.5	11.46	2.41	0.23	0.15	N/A	98.16		17	50.0051	1.96339	13.9585	13.0075	6.6469	11.719	2.46446	0.235198	98.16
	18	48.9	2.17	12.82	13.86	0.25	5.92	10.57	2.6	0.28	0.18	N/A	97.54		18	50.3553	2.23458	13.2015	14.2725	6.09618	10.8846	2.67738	0.288333	97.54
	19	48.9	1.44	14.02	11.64	0.22	7.46	12.65	2.16	0.14	0.1	N/A	98.71		19	49.7002	1.46356	14.2494	11.8305	7.58207	12.857	2.19535	0.142291	98.71
	20	48.21	1.96	13.66	12.98	0.23	6.22	10.92	2.61	0.26	0.16	N/A	97.21		20	49.7934	2.02438	14.1087	13.4063	6.42429	11.2787	2.69572	0.26854	97.21
	21	48.14	1.8	13.37	12.53	0.23	6.79	11.52	2.52	0.21	0.14	N/A	97.24		21	49.6955	1.85816	13.802	12.9349	7.00939	11.8922	2.60142	0.216785	97.24
	(iv) V1477, Hvítárvatn (Larsen et al., 2011)														(iv) V1477, Hvítárvatn (Larsen et al., 2011)
	n	SiO2	TiO2	Al2O3	FeO	MnO	MgO	CaO	Na2O	K2O	P2O5	Cl	Total Oxides		n	SiO2	TiO2	Al2O3	FeO	MgO	CaO	Na2O	K2O	Total Oxides
	1	49.6312	1.8749	13.5607	12.4803	0.2432	6.5175	11.3341	2.5078	0.226	0.1644	N/A	98.5401		1	50.5757	1.91058	13.8188	12.7178	6.64153	11.5498	2.55552	0.230301	98.5401
	2	49.8417	1.9203	13.4992	12.5066	0.2274	6.3935	11.4716	2.3983	0.2254	0.1692	N/A	98.6532		2	50.7261	1.95437	13.7387	12.7285	6.50694	11.6751	2.44085	0.229399	98.6532
	3	49.6495	1.9068	13.4607	12.3389	0.2383	6.3538	11.4846	2.3905	0.2418	0.1659	N/A	98.2308		3	50.7526	1.94916	13.7598	12.613	6.49496	11.7398	2.44361	0.247172	98.2308
	4	49.8583	1.8725	13.545	12.5566	0.2049	6.5695	11.4957	2.4539	0.2313	0.1618	N/A	98.9495		4	50.575	1.89942	13.7397	12.7371	6.66394	11.661	2.48918	0.234625	98.9495
	5	49.439	1.8438	13.5197	12.4424	0.259	6.5374	11.4192	2.4612	0.2373	0.1627	N/A	98.3217		5	50.4995	1.88335	13.8097	12.7093	6.67763	11.6641	2.51399	0.24239	98.3217
	6	49.6359	1.8807	13.4946	12.3162	0.2308	6.5383	11.5551	2.4865	0.2241	0.1758	N/A	98.538		6	50.5811	1.91651	13.7516	12.5507	6.6628	11.7751	2.53385	0.228367	98.538
	7	50.318	1.83146	13.9609	12.3173	0.2073	6.59831	11.4336	2.45952	0.2301	0.1902	N/A	99.5467		7	50.7498	1.84718	14.0807	12.423	6.65494	11.5317	2.48063	0.232075	99.5467
	8	50.1582	1.84005	13.7855	12.62	0.2404	6.6815	11.5223	2.46774	0.2407	0.1903	N/A	99.7467		8	50.5037	1.85272	13.8804	12.7069	6.72752	11.6016	2.48474	0.242358	99.7467
	9	50.3032	1.84285	13.8403	12.6513	0.1873	6.54206	11.4586	2.42539	0.2417	0.1617	N/A	99.6543		9	50.6551	1.85574	13.9371	12.7398	6.58783	11.5387	2.44236	0.243391	99.6543
	10	49.9972	1.85863	13.8513	12.8112	0.2375	6.67531	11.5541	2.49218	0.2381	0.165	N/A	99.8805		10	50.2596	1.86838	13.9239	12.8784	6.71034	11.6147	2.50526	0.239349	99.8805
	11	50.6019	1.86811	13.9044	12.5868	0.1998	6.70163	11.5618	2.45858	0.2253	0.1714	N/A	100.28		11	50.6482	1.86982	13.9171	12.5983	6.70776	11.5724	2.46083	0.225506	100.28
	12	50.3338	1.86811	13.8668	12.748	0.2167	6.58273	11.4214	2.48397	0.2496	0.135	N/A	99.9062		12	50.5591	1.87647	13.9289	12.805	6.61219	11.4725	2.49508	0.250717	99.9062
	13	49.5473	1.86182	13.7749	12.8368	0.2389	6.63619	11.5773	2.45542	0.2229	0.1878	N/A	99.3393		13	50.092	1.88229	13.9263	12.9779	6.70915	11.7045	2.48241	0.22535	99.3393
	14	50.0928	1.88239	13.7226	12.7853	0.1889	6.53257	11.366	2.5004	0.2239	0.1639	N/A	99.4588		14	50.5447	1.89937	13.8464	12.9006	6.5915	11.4685	2.52296	0.22592	99.4588
	15	50.3761	1.89018	13.8604	12.5564	0.2065	6.59295	11.4982	2.40379	0.2493	0.17	N/A	99.8039		15	50.6662	1.90107	13.9403	12.6288	6.63092	11.5644	2.41764	0.250736	99.8039
	16	50.3423	1.89657	13.8442	12.7008	0.2244	6.58933	11.4732	2.46563	0.2207	0.1713	N/A	99.9284		16	50.5786	1.90548	13.9092	12.7605	6.62027	11.5271	2.47721	0.221736	99.9284
	17	50.3984	1.89727	13.8677	12.5123	0.2258	6.60461	11.395	2.41233	0.2304	0.167	N/A	99.7109		17	50.7445	1.9103	13.963	12.5982	6.64996	11.4732	2.42889	0.231982	99.7109
	18	49.8721	1.91215	13.7455	13.0051	0.2176	6.49376	11.4185	2.45141	0.2159	0.1952	N/A	99.5273		18	50.3177	1.92923	13.8683	13.1213	6.55178	11.5205	2.47331	0.217829	99.5273
	19	50.1732	1.92423	13.7765	12.8435	0.197	6.58582	11.5154	2.55676	0.2483	0.1181	N/A	99.9389		19	50.3627	1.9315	13.8285	12.892	6.6107	11.5589	2.56642	0.249238	99.9389
	20	50.1429	1.9469	13.8174	12.7785	0.2006	6.54857	11.3783	2.46627	0.2591	0.2231	N/A	99.7616		20	50.4772	1.95988	13.9095	12.8636	6.59221	11.4541	2.48271	0.260827	99.7616
	21	50.2907	1.96488	13.8468	13.0805	0.1779	6.32367	11.1708	2.42328	0.257	0.1667	N/A	99.7022		21	50.6159	1.97758	13.9363	13.1651	6.36455	11.243	2.43895	0.258662	99.7022
	22	49.7339	1.5842	13.3662	10.6769	0.1949	7.253	12.2521	2.2058	0.1633	0.1193	N/A	97.5496		22	51.1479	1.62924	13.7462	10.9805	7.45922	12.6005	2.26852	0.167943	97.5496
	23	50.6667	1.7909	13.4959	12.5258	0.2246	6.3602	11.2873	2.4449	0.2359	0.1674	N/A	99.1996		23	51.2781	1.81251	13.6588	12.677	6.43695	11.4235	2.4744	0.238747	99.1996
	24	49.5968	1.8253	13.6956	12.6655	0.2074	6.5738	11.3912	2.5986	0.2738	0.1783	N/A	99.0063		24	50.2905	1.85083	13.8872	12.8427	6.66575	11.5505	2.63495	0.27763	99.0063
	25	49.759	1.848	13.4778	12.6688	0.2282	6.3021	11.3069	2.6395	0.2253	0.1816	N/A	98.6372		25	50.6569	1.88135	13.721	12.8974	6.41583	11.5109	2.68713	0.229366	98.6372
	26	49.2809	1.8566	13.2623	12.5232	0.2187	6.3205	11.3737	2.5646	0.2571	0.1774	N/A	97.835		26	50.5762	1.9054	13.6109	12.8524	6.48663	11.6726	2.63201	0.263858	97.835
	27	49.4562	1.8866	13.7166	12.8714	0.2187	6.2758	11.2945	2.4468	0.2542	0.168	N/A	98.5888		27	50.3617	1.92114	13.9677	13.1071	6.3907	11.5013	2.4916	0.258854	98.5888
	28	49.3634	1.8892	13.1157	13.1135	0.2376	6.5207	11.3267	2.3105	0.2149	0.1655	N/A	98.2577		28	50.4457	1.93062	13.4033	13.401	6.66366	11.575	2.36116	0.219612	98.2577
	29	50.194	1.906	13.3739	12.4884	0.2192	6.358	11.2753	2.7113	0.2467	0.1715	N/A	98.9443		29	50.9307	1.93397	13.5702	12.6717	6.45131	11.4408	2.75109	0.250321	98.9443
	30	50.378	1.9079	13.3289	12.4224	0.2211	6.4286	11.3212	2.4031	0.2493	0.1829	N/A	98.8434		30	51.1767	1.93815	13.5402	12.6193	6.53052	11.5007	2.4412	0.253252	98.8434
	31	49.5743	1.913	13.7592	12.7065	0.2144	6.512	11.3129	2.4434	0.2097	0.1656	N/A	98.811		31	50.3645	1.94349	13.9785	12.909	6.6158	11.4932	2.48235	0.213043	98.811
	32	49.3642	1.9189	13.6767	12.6909	0.2318	6.466	11.1599	2.5684	0.2582	0.17	N/A	98.505		32	50.3186	1.956	13.9411	12.9363	6.59102	11.3757	2.61806	0.263192	98.505
	33	50.0171	1.9234	13.1115	12.7201	0.232	6.5016	11.113	2.5532	0.2246	0.1595	N/A	98.556		33	50.9523	1.95936	13.3567	12.9579	6.62317	11.3208	2.60094	0.2288	98.556
	34	49.7211	1.9287	12.8416	12.9315	0.2186	6.5223	11.3897	2.4516	0.2527	0.1839	N/A	98.4417		34	50.7155	1.96727	13.0984	13.1901	6.65275	11.6175	2.50063	0.257754	98.4417
	35	49.2421	1.9314	13.8093	12.6821	0.2217	6.322	11.3569	2.5676	0.2773	0.1524	N/A	98.5628		35	50.1505	1.96703	14.064	12.916	6.43862	11.5664	2.61496	0.282415	98.5628
	(v) V1477, Lake Lögurinn, (Gudmundsdóttir et al., 2011)														(v) V1477, Lake Lögurinn, (Gudmundsdóttir et al., 2011)
	n	SiO2	TiO2	Al2O3	FeO	MnO	MgO	CaO	Na2O	K2O	P2O5	Cl	Total Oxides		n	SiO2	TiO2	Al2O3	FeO	MgO	CaO	Na2O	K2O	Total Oxides
	1	50.53	2.01	13.73	13.1	0.303	6.72	10.85	2.42	0.254	N/A	N/A	99.917		1	50.7258	2.01779	13.7832	13.1508	6.74604	10.892	2.42938	0.254984	99.917
	2	50.19	2	13.64	13.34	0.201	6.81	11.17	2.57	0.265	N/A	N/A	100.187		2	50.197	2.00028	13.6419	13.3419	6.81095	11.1716	2.57036	0.265037	100.187
	3	50.27	1.98	13.87	13.45	0.18	6.94	11.49	2.51	0.267	N/A	N/A	100.957		3	49.8824	1.96473	13.7631	13.3463	6.88649	11.4014	2.49065	0.264941	100.957
	4	50.11	1.98	14.06	13.02	0.202	6.72	11.21	2.63	0.243	N/A	N/A	100.175		4	50.1235	1.98053	14.0638	13.0235	6.72181	11.213	2.63071	0.243066	100.175
	5	50.56	1.98	13.47	13.24	0.202	6.54	11.51	2.57	0.242	N/A	N/A	100.314		5	50.5034	1.97778	13.4549	13.2252	6.53268	11.4971	2.56712	0.241729	100.314
	6	50.96	1.95	13.64	13.28	0.267	6.66	11.28	1.87	0.243	N/A	N/A	100.149		6	51.0202	1.9523	13.6561	13.2957	6.66787	11.2933	1.87221	0.243287	100.149
	7	50.27	1.93	13.71	12.3	0.18	6.81	11.23	2.59	0.257	N/A	N/A	99.278		7	50.7276	1.94757	13.8348	12.412	6.87199	11.3322	2.61357	0.259339	99.278
	8	49.81	1.92	13.57	12.81	0.259	6.71	11.27	2.63	0.236	N/A	N/A	99.215		8	50.3355	1.94026	13.7132	12.9451	6.78079	11.3889	2.65775	0.23849	99.215
	9	50.4	1.91	13.66	13.27	0.173	6.65	11.49	2.71	0.244	N/A	N/A	100.507		9	50.2322	1.90364	13.6145	13.2258	6.62786	11.4518	2.70098	0.243188	100.507
	10	50.19	1.9	13.82	13.13	0.295	6.75	11.24	2.55	0.267	N/A	N/A	100.142		10	50.2669	1.90291	13.8412	13.1501	6.76034	11.2572	2.55391	0.267409	100.142
	11	50.21	1.9	13.53	13.31	0.209	6.75	11.5	2.52	0.265	N/A	N/A	100.194		11	50.2175	1.90029	13.532	13.312	6.75101	11.5017	2.52038	0.26504	100.194
	12	50.22	1.89	13.85	13.29	0.273	6.79	11.25	2.64	0.241	N/A	N/A	100.444		12	50.1343	1.88677	13.8264	13.2673	6.77841	11.2308	2.63549	0.240589	100.444
	(vi) V1477, Gripdeild (Bergþórsdóttir, 2014)														(vi) V1477, Gripdeild (Bergþórsdóttir, 2014)
	n	SiO2	TiO2	Al2O3	FeO	MnO	MgO	CaO	Na2O	K2O	P2O5	Cl	Total Oxides		n	SiO2	TiO2	Al2O3	FeO	MgO	CaO	Na2O	K2O	Total Oxides
	1	48.81	1.84	13.15	13.35	0.22	6.81	11.25	2.68	0.21	0.15	N/A	98.47		1	49.7554	1.87564	13.4047	13.6086	6.9419	11.4679	2.73191	0.214067	98.47
	2	48.98	1.84	13.49	13	0.21	6.72	11.33	2.69	0.25	0.25	N/A	98.76		2	49.8271	1.87182	13.7233	13.2248	6.83622	11.5259	2.73652	0.254323	98.76
	3	49.13	1.87	13.61	13.32	0.24	6.52	11.58	2.11	0.24	0.15	N/A	98.77		3	49.939	1.90079	13.8341	13.5393	6.62736	11.7707	2.14474	0.243952	98.77
	4	49.29	1.82	13.33	13.13	0.21	6.79	11.31	2.59	0.23	0.13	N/A	98.83		4	50.0457	1.8479	13.5344	13.3313	6.8941	11.4834	2.62971	0.233526	98.83
	5	49.46	1.84	13.65	13.22	0.21	6.83	11.37	2.52	0.31	0.14	N/A	99.55		5	49.8589	1.85484	13.7601	13.3266	6.88508	11.4617	2.54032	0.3125	99.55
	6	49.51	1.86	13.26	12.83	0.21	6.83	11.38	2.46	0.21	0.15	N/A	98.7		6	50.3457	1.8914	13.4838	13.0466	6.94529	11.5721	2.50153	0.213545	98.7
	7	49.6	1.9	13.26	12.83	0.21	6.73	11.23	2.56	0.22	0.13	N/A	98.67		7	50.4424	1.93227	13.4852	13.0479	6.8443	11.4207	2.60348	0.223736	98.67
	8	49.67	1.86	13.48	12.76	0.22	6.66	11.16	2.47	0.22	0.14	N/A	98.64		8	50.5393	1.89255	13.7159	12.9833	6.77656	11.3553	2.51323	0.22385	98.64
	9	49.74	1.87	13.25	12.74	0.22	6.89	11.41	2.18	0.2	0.13	N/A	98.63		9	50.6105	1.90273	13.4819	12.963	7.01058	11.6097	2.21815	0.2035	98.63
	10	49.75	1.83	13.69	13.01	0.22	6.69	11.32	2.53	0.23	0.13	N/A	99.4		10	50.2272	1.84755	13.8213	13.1348	6.75416	11.4286	2.55427	0.232206	99.4
	11	49.89	1.86	13.32	12.73	0.22	6.77	11.44	2.54	0.27	0.14	N/A	99.18		11	50.4857	1.88221	13.4791	12.882	6.85084	11.5766	2.57033	0.273224	99.18
	12	49.93	1.86	13.9	13.35	0.21	6.64	11.58	2.58	0.23	0.24	N/A	100.52		12	49.8951	1.8587	13.8903	13.3407	6.63536	11.5719	2.5782	0.229839	100.52
	13	50.04	1.65	14.02	12.13	0.21	7.2	11.72	2.3	0.23	0.13	N/A	99.63		13	50.3978	1.6618	14.1203	12.2167	7.25149	11.8038	2.31645	0.231645	99.63
	14	50.07	1.87	13.71	12.86	0.21	6.85	11.28	2.73	0.23	0.14	N/A	99.95		14	50.2711	1.87751	13.7651	12.9116	6.87751	11.3253	2.74096	0.230924	99.95
	15	50.09	1.83	13.49	12.96	0.22	6.58	11.54	2.58	0.22	0.14	N/A	99.65		15	50.4482	1.84309	13.5865	13.0527	6.62705	11.6225	2.59845	0.221573	99.65
	16	50.11	1.91	13.58	13.42	0.23	6.59	11.29	2.44	0.25	0.14	N/A	99.96		16	50.3163	1.91786	13.6359	13.4752	6.61713	11.3365	2.45005	0.251029	99.96
	17	50.16	1.9	13.35	13.02	0.21	6.67	11.18	2.65	0.22	0.14	N/A	99.5		17	50.59	1.91629	13.4644	13.1316	6.72718	11.2758	2.67272	0.221886	99.5
	18	48.04	1.83	12.98	13.19	0.2	6.7	11.33	2.71	0.23	0.14	N/A	97.35		18	49.5207	1.8864	13.3801	13.5965	6.9065	11.6792	2.79353	0.237089	97.35
	19	49.2	1.8	13.58	13.15	0.23	6.88	11.49	2.53	0.22	0.15	N/A	99.23		19	49.7724	1.82094	13.738	13.303	6.96004	11.6237	2.55943	0.222559	99.23
	20	49.22	1.93	13.63	13.31	0.21	6.54	11.36	2.56	0.22	0.16	N/A	99.14		20	49.8329	1.95403	13.7997	13.4758	6.62144	11.5015	2.59188	0.22274	99.14
	21	49.25	1.87	13.29	12.87	0.22	6.68	11.41	2.7	0.22	0.14	N/A	98.65		21	50.1068	1.90253	13.5212	13.0939	6.79622	11.6085	2.74697	0.223827	98.65
	22	49.28	1.87	13.1	13.18	0.21	6.73	11.59	2.54	0.22	0.14	N/A	98.86		22	50.0254	1.89828	13.2981	13.3794	6.83179	11.7653	2.57842	0.223328	98.86
	23	49.3	1.87	13.74	13.15	0.2	6.68	11.41	2.4	0.24	0.15	N/A	99.14		23	49.9038	1.8929	13.9083	13.3111	6.76182	11.5498	2.4294	0.24294	99.14
	24	49.42	1.88	13.59	13.06	0.21	6.65	11.41	2.54	0.25	0.15	N/A	99.16		24	50.0202	1.90283	13.7551	13.2186	6.73077	11.5486	2.57085	0.253036	99.16
	25	49.53	1.88	13.71	13.22	0.22	6.62	11.33	2.55	0.17	0.15	N/A	99.38		25	50.0252	1.8988	13.8471	13.3522	6.68619	11.4433	2.5755	0.1717	99.38
	26	49.53	1.84	13.44	13.17	0.22	6.55	11.48	2.59	0.26	0.14	N/A	99.22		26	50.1012	1.86122	13.595	13.3219	6.62553	11.6124	2.61987	0.262998	99.22
	27	49.79	1.82	13.3	12.87	0.21	6.79	11.42	2.42	0.3	0.15	N/A	99.07		27	50.4407	1.84378	13.4738	13.0382	6.87874	11.5692	2.45163	0.303921	99.07
	28	49.79	1.86	13.07	13.16	0.22	6.8	11.49	2.32	0.25	0.15	N/A	99.11		28	50.4254	1.88374	13.2368	13.3279	6.88677	11.6366	2.34961	0.25319	99.11
	29	49.85	1.86	13.45	13.01	0.22	6.64	11.4	2.67	0.22	0.14	N/A	99.46		29	50.3027	1.87689	13.5721	13.1282	6.7003	11.5035	2.69425	0.221998	99.46
	30	49.87	1.88	13.47	12.69	0.23	6.56	11.31	2.71	0.24	0.14	N/A	99.1		30	50.5115	1.90418	13.6433	12.8532	6.64438	11.4555	2.74486	0.243087	99.1
	31	49.9	1.85	13.53	12.68	0.22	6.68	11.4	2.54	0.22	0.14	N/A	99.16		31	50.5061	1.87247	13.6943	12.834	6.76113	11.5385	2.57085	0.222672	99.16
	32	49.94	1.86	13.71	12.98	0.2	6.73	11.41	2.58	0.24	0.14	N/A	99.79		32	50.2162	1.87029	13.7858	13.0518	6.76722	11.4731	2.59427	0.241327	99.79
	33	50.07	1.87	13.74	13.09	0.21	6.84	11.67	2.42	0.25	0.14	N/A	100.3		33	50.095	1.87094	13.7469	13.0965	6.84342	11.6758	2.42121	0.250125	100.3
	34	50.08	1.91	13.38	13.18	0.23	6.5	11.19	2.61	0.27	0.15	N/A	99.5		34	50.5246	1.92696	13.4988	13.297	6.55771	11.2893	2.63317	0.272397	99.5
	35	50.24	1.95	13.74	13.44	0.23	6.42	10.88	2.65	0.18	0.14	N/A	99.87		35	50.4925	1.9598	13.809	13.5075	6.45226	10.9347	2.66332	0.180905	99.87
	36	50.35	1.85	13.56	12.84	0.22	6.77	11.44	2.58	0.25	0.14	N/A	100		36	50.5319	1.85668	13.609	12.8864	6.79446	11.4813	2.58932	0.250903	100
	37	50.36	1.86	13.58	13.28	0.22	6.82	11.6	1.91	0.19	0.14	N/A	99.96		37	50.5622	1.86747	13.6345	13.3333	6.84739	11.6466	1.91767	0.190763	99.96
	38	48.95	1.88	13.36	12.82	0.22	6.79	11.29	2.67	0.23	0.16	N/A	98.37		38	49.9541	1.91856	13.634	13.083	6.92928	11.5216	2.72477	0.234718	98.37
	39	49.06	1.82	13.41	12.74	0.22	6.57	11.59	2.51	0.22	0.15	N/A	98.29		39	50.1021	1.85866	13.6949	13.0106	6.70956	11.8362	2.56332	0.224673	98.29
	40	49.16	1.86	13.28	12.96	0.21	6.84	11.22	2.62	0.28	0.16	N/A	98.59		40	50.0509	1.89371	13.5207	13.1949	6.96396	11.4233	2.66748	0.285074	98.59
	41	49.24	1.88	13.53	12.78	0.21	6.75	11.55	2.33	0.25	0.14	N/A	98.66		41	50.0865	1.91232	13.7626	12.9997	6.86604	11.7486	2.37005	0.254298	98.66
	42	49.3	1.91	13.52	13.13	0.23	6.61	11.43	2.56	0.32	0.17	N/A	99.18		42	49.9089	1.93359	13.687	13.2922	6.69164	11.5712	2.59162	0.323952	99.18
	43	49.41	1.91	13.54	12.92	0.22	6.81	11.3	2.55	0.27	0.17	N/A	99.1		43	50.0557	1.93496	13.7169	13.0888	6.899	11.4477	2.58332	0.273529	99.1
	44	49.41	1.89	13.59	12.84	0.22	6.67	11.3	2.59	0.23	0.16	N/A	98.9		44	50.1523	1.91839	13.7942	13.0329	6.7702	11.4698	2.62891	0.233455	98.9
	45	49.45	1.88	13.31	12.98	0.22	6.81	11.5	2.61	0.2	0.15	N/A	99.11		45	50.081	1.90399	13.4798	13.1456	6.8969	11.6467	2.64331	0.202552	99.11
	46	49.57	1.85	13.42	13.16	0.21	6.69	11.42	2.49	0.22	0.16	N/A	99.19		46	50.1619	1.87209	13.5802	13.3171	6.76988	11.5564	2.51973	0.222627	99.19
	47	49.66	1.9	13.37	13.26	0.23	6.62	11.26	2.52	0.27	0.17	N/A	99.26		47	50.2327	1.92191	13.5242	13.4129	6.69634	11.3898	2.54906	0.273113	99.26
	48	49.7	1.89	13.19	13.4	0.21	6.43	11.48	2.6	0.27	0.17	N/A	99.34		48	50.2223	1.90986	13.3286	13.5408	6.49757	11.6006	2.62732	0.272838	99.34
	49	49.83	1.87	13.18	12.83	0.21	6.68	11.23	2.6	0.24	0.17	N/A	98.84		49	50.6094	1.89925	13.3861	13.0307	6.78448	11.4056	2.64067	0.243754	98.84
	50	49.9	1.89	13.38	12.98	0.22	6.69	11.41	2.45	0.27	0.16	N/A	99.35		50	50.4193	1.90967	13.5192	13.1151	6.75962	11.5287	2.4755	0.27281	99.35
	51	50.03	1.96	13.36	13.35	0.22	6.43	11.18	2.74	0.23	0.16	N/A	99.66		51	50.3928	1.97421	13.4569	13.4468	6.47663	11.2611	2.75987	0.231668	99.66
	(vii) V1477, Vatnajökull sites compilation (Óladóttir et al., 2011)														(vii) V1477, Vatnajökull sites compilation (Óladóttir et al., 2011)
	n	SiO2	TiO2	Al2O3	FeO	MnO	MgO	CaO	Na2O	K2O	P2O5	Cl	Total Oxides		n	SiO2	TiO2	Al2O3	FeO	MgO	CaO	Na2O	K2O	Total Oxides
	1	49.41	1.78	13.94	12.69	0.16	6.68	11.4	2.19	0.22	0.15	N/A	98.61		1	50.2645	1.81078	14.1811	12.9095	6.79552	11.5972	2.22787	0.223805	98.61
	2	49.63	1.92	14.03	12.69	0.35	6.74	11.45	2.43	0.22	0.17	N/A	99.63		2	50.0757	1.93724	14.156	12.804	6.80052	11.5528	2.45182	0.221976	99.63
	3	49.73	1.8	13.7	12.54	0.27	6.76	11.56	2.6	0.22	0.09	N/A	99.27		3	50.278	1.81984	13.851	12.6782	6.8345	11.6874	2.62865	0.222424	99.27
	4	49.93	1.83	13.84	12.86	0.26	6.73	11.54	2.32	0.21	0.15	N/A	99.68		4	50.2972	1.84346	13.9418	12.9546	6.77949	11.6249	2.33706	0.211544	99.68
	5	50	1.83	13.97	12.67	0.21	6.84	11.57	2.3	0.21	0.12	N/A	99.71		5	50.3119	1.84142	14.0572	12.749	6.88267	11.6422	2.31435	0.21131	99.71
	6	50.15	1.87	13.81	12.34	0.25	6.8	11.47	2.32	0.21	0.14	N/A	99.35		6	50.677	1.88965	13.9551	12.4697	6.87146	11.5905	2.34438	0.212207	99.35
	7	49.63	1.83	13.83	12.88	0.28	6.64	11.36	2.46	0.24	0.14	N/A	99.31		7	50.1871	1.85054	13.9852	13.0246	6.71453	11.4875	2.48761	0.242694	99.31
	8	49.63	1.88	13.88	13.02	0.19	6.51	11.18	2.42	0.24	0.19	N/A	99.13		8	50.2582	1.9038	14.0557	13.1848	6.59241	11.3215	2.45063	0.243038	99.13
	9	50.28	1.88	13.78	12.81	0.24	6.52	11.38	2.3	0.24	0.2	N/A	99.62		9	50.6957	1.89554	13.8939	12.9159	6.57391	11.4741	2.31902	0.241984	99.62
	10	49.75	1.91	13.79	12.75	0.22	6.71	11.46	2.19	0.25	0.13	N/A	99.16		10	50.3492	1.933	13.9561	12.9036	6.79081	11.598	2.21637	0.253011	99.16
	11	50.06	1.96	13.71	13.4	0.24	6.42	11.24	2.32	0.23	0.15	N/A	99.73		11	50.3926	1.97302	13.8011	13.489	6.46265	11.3147	2.33541	0.231528	99.73
	12	49.89	1.99	13.82	12.86	0.33	6.21	11	2.33	0.24	0.23	N/A	98.91		12	50.727	2.02339	14.0519	13.0757	6.31418	11.1845	2.36909	0.244026	98.91
	13	49.67	1.87	13.97	12.41	0.25	6.57	11.32	2.37	0.26	0.17	N/A	98.84		13	50.4674	1.90002	14.1943	12.6092	6.67547	11.5017	2.40805	0.264174	98.84
	14	49.08	1.94	14.14	12.87	0.1	6.38	10.85	2.47	0.24	0.2	N/A	98.28		14	50.0919	1.98	14.4315	13.1353	6.51153	11.0737	2.52092	0.244948	98.28
	15	49.77	1.97	13.97	12.97	0.2	6.51	10.97	2.31	0.25	0.26	N/A	99.18		15	50.4153	1.99554	14.1511	13.1382	6.59441	11.1122	2.33995	0.253241	99.18
	16	49.27	2.01	14.18	13.01	0.21	6.27	11.14	2.57	0.25	0.18	N/A	99.09		16	49.9189	2.03647	14.3668	13.1814	6.35258	11.2867	2.60385	0.253293	99.09
	17	50.64	1.87	14.03	11.94	0.25	6.61	11.72	2.41	0.23	0.19	N/A	99.88		17	50.9252	1.88053	14.109	12.0072	6.64722	11.786	2.42357	0.231295	99.88
	18	50.41	1.93	13.85	12.65	0.23	6.5	11.32	2.41	0.23	0.06	N/A	99.6		18	50.7602	1.94341	13.9462	12.7379	6.54516	11.3987	2.42674	0.231598	99.6
	19	49.99	1.99	13.84	13.17	0.32	6.55	11.11	2.55	0.24	0.14	N/A	99.89		19	50.2766	2.00141	13.9193	13.2455	6.58755	11.1737	2.56462	0.241376	99.89
	20	50.23	2	13.79	12.62	0.12	6.18	11.05	2.38	0.26	0.2	N/A	98.85		20	50.9794	2.02984	13.9957	12.8083	6.2722	11.2149	2.41551	0.263879	98.85
	21	49.4	1.81	14	12.03	0.29	7.25	11.79	2.36	0.2	0.23	N/A	99.36		21	49.9798	1.83124	14.1643	12.1712	7.33509	11.9284	2.3877	0.202347	99.36
	22	49.97	1.92	13.88	12.21	0.16	6.64	11.14	2.31	0.24	0.22	N/A	98.67		22	50.8394	1.9534	14.1215	12.4224	6.75552	11.3338	2.35019	0.244175	98.67
	23	50.07	1.95	13.75	12.37	0.11	6.5	11.14	2.56	0.24	0.22	N/A	98.92		23	50.7861	1.97789	13.9466	12.5469	6.59296	11.2993	2.59661	0.243432	98.92
	24	49.46	2.05	13.47	12.58	0.18	6.29	11.18	2.39	0.25	0.2	N/A	98.04		24	50.6451	2.09912	13.7928	12.8814	6.44071	11.4479	2.44727	0.25599	98.04
	25	48.88	1.9	13.45	13.02	0.25	6.62	11.23	2.35	0.26	0.19	N/A	98.17		25	50.0153	1.94413	13.7624	13.3224	6.77376	11.4908	2.40458	0.266039	98.17
	26	50.19	1.93	13.8	12.64	0.19	6.65	11.18	2.29	0.23	0.2	N/A	99.3		26	50.7431	1.95127	13.9521	12.7793	6.72328	11.3032	2.31524	0.232535	99.3
	27	49.77	1.94	13.66	12.74	0.32	6.57	11.23	2.45	0.23	0.12	N/A	99.02		27	50.4869	1.96794	13.8568	12.9235	6.66464	11.3918	2.48529	0.233313	99.02
	28	49.63	1.95	13.74	12.66	0.2	6.55	11.2	2.55	0.25	0.2	N/A	98.93		28	50.3704	1.97909	13.945	12.8489	6.64772	11.3671	2.58804	0.25373	98.93
	29	49.68	1.96	13.75	12.63	0.26	6.44	11.05	2.51	0.25	0.15	N/A	98.67		29	50.5597	1.99471	13.9935	12.8537	6.55404	11.2457	2.55445	0.254427	98.67
	30	49.8	2.04	13.79	13.26	0.23	6.44	10.92	2.44	0.25	0.19	N/A	99.37		30	50.3284	2.06165	13.9363	13.4007	6.50834	11.0359	2.46589	0.252653	99.37
	(viii) MD99-2275 179 cm (Larsen et al., 2002)														(viii) MD99-2275 179 cm (Larsen et al., 2002)
	n	SiO2	TiO2	Al2O3	FeO	MnO	MgO	CaO	Na2O	K2O	P2O5	Cl	Total Oxides		n	SiO2	TiO2	Al2O3	FeO	MgO	CaO	Na2O	K2O	Total Oxides
	1	49.66	1.9	13.94	13.36	N/A	6.65	11.49	2.44	0.3	0.12	N/A	99.86		1	49.7895	1.90495	13.9763	13.3948	6.66734	11.52	2.44636	0.300782	99.86
	2	49.47	1.94	13.32	13.46	N/A	6.3	11.5	2.51	0.23	0.24	N/A	98.97		2	50.1064	1.96495	13.4913	13.6331	6.38104	11.6479	2.54229	0.232959	98.97
	3	48.86	1.94	14.21	12.88	N/A	6.49	11.65	2.23	0.23	0.31	N/A	98.8		3	49.6091	1.96974	14.4279	13.0775	6.5895	11.8286	2.26419	0.233526	98.8
	4	48.15	2.01	13.41	12.66	N/A	7.56	12.48	2.14	0.25	0.11	N/A	98.77		4	48.804	2.0373	13.5921	12.8319	7.66268	12.6495	2.16907	0.253395	98.77
	5	49.25	2.02	13.18	13.67	N/A	6.26	11.56	2.4	0.31	0.16	N/A	98.81		5	49.924	2.04764	13.3604	13.8571	6.34567	11.7182	2.43284	0.314242	98.81
	6	50.65	2.09	12.96	13.71	N/A	6.6	11.43	2.21	0.23	0.16	N/A	100.04		6	50.7109	2.09251	12.9756	13.7265	6.60793	11.4437	2.21266	0.230276	100.04
	(ix) MD99-2275 177-178 cm (Gudmundsdóttir et al., 2011)														(ix) MD99-2275 177-178 cm (Gudmundsdóttir et al., 2011)
	n	SiO2	TiO2	Al2O3	FeO	MnO	MgO	CaO	Na2O	K2O	P2O5	Cl	Total Oxides		n	SiO2	TiO2	Al2O3	FeO	MgO	CaO	Na2O	K2O	Total Oxides
	1	49.66	2.23	14.38	14.08	0.12	6.46	11.38	2.49	0.25	N/A	N/A	101.05		1	49.2024	2.20945	14.2475	13.9503	6.40048	11.2751	2.46706	0.247696	101.05
	4	48.54	2.17	14.17	13.91	0.25	6.12	10.48	2.53	0.26	N/A	N/A	98.42		4	49.4448	2.21045	14.4341	14.1693	6.23408	10.6754	2.57716	0.264847	98.42
	5	49.51	2.13	13.41	14	0.25	6.31	11.24	2.37	0.27	N/A	N/A	99.49		5	49.8892	2.14631	13.5127	14.1072	6.35832	11.3261	2.38815	0.272068	99.49
	6	48.67	2.1	13.27	13.16	0.13	6.15	10.79	1.67	0.29	N/A	N/A	96.22		6	50.6504	2.18545	13.81	13.6955	6.40025	11.2291	1.73795	0.3018	96.22
	7	50.26	2.09	14.28	12.34	0.25	7.26	11.86	2.45	0.26	N/A	N/A	101.07		7	49.8512	2.073	14.1639	12.2396	7.20095	11.7635	2.43007	0.257885	101.07
	9	50.44	2.08	13.98	13.24	0.23	6.53	11.32	2.48	0.25	N/A	N/A	100.54		9	50.2841	2.07357	13.9368	13.1991	6.50982	11.285	2.47234	0.249227	100.54
	10	49.88	2.06	14.21	13.02	0.32	6.82	11.65	2.06	0.27	N/A	N/A	100.28		10	49.9	2.06082	14.2157	13.0252	6.82273	11.6547	2.06082	0.270108	100.28
	11	50.02	2.01	13.97	13.37	0.23	6.66	11.29	2.13	0.25	N/A	N/A	99.92		11	50.1755	2.01625	14.0134	13.4116	6.68071	11.3251	2.13662	0.250777	99.92
	12	49.92	1.96	14	13.14	0.15	6.62	11.11	2.01	0.32	N/A	N/A	99.22		12	50.3886	1.9784	14.1314	13.2633	6.68214	11.2143	2.02887	0.323004	99.22
	13	49.05	1.94	14.49	13.16	0.18	6.42	11.32	2.51	0.23	N/A	N/A	99.29		13	49.4905	1.95742	14.6201	13.2782	6.47765	11.4217	2.53254	0.232065	99.29
	(x) MOR-T1, An Loch Mór (Chambers et al., 2004)														(x) MOR-T1, An Loch Mór (Chambers et al., 2004)
	n	SiO2	TiO2	Al2O3	FeO	MnO	MgO	CaO	Na2O	K2O	P2O5	Cl	Total Oxides		n	SiO2	TiO2	Al2O3	FeO	MgO	CaO	Na2O	K2O	Total Oxides
	1	48.81	1.81	13.05	12.17	0.13	6.64	11.24	2.4	0.22	N/A	N/A	96.47		1	50.6643	1.87876	13.5458	12.6323	6.89226	11.667	2.49118	0.228358	96.47
	2	48.05	1.73	13.39	12.54	0.14	6.62	11	2.45	0.18	N/A	N/A	96.1		2	50.0729	1.80283	13.9537	13.0679	6.89871	11.4631	2.55315	0.187578	96.1
	3	48.78	1.82	13.06	12.54	0.17	6.42	10.67	2.52	0.2	N/A	N/A	96.18		3	50.8072	1.89564	13.6027	13.0611	6.6868	11.1134	2.62473	0.208312	96.18
	4	47.61	1.98	12.48	13.36	0.37	6.11	10.68	2.51	0.2	N/A	N/A	95.3		4	50.1527	2.08575	13.1465	14.0735	6.43632	11.2504	2.64405	0.210682	95.3
	5	48.56	1.84	13.2	12.33	0.2	6.43	10.91	2.69	0.2	N/A	N/A	96.36		5	50.4992	1.91348	13.7271	12.8224	6.68677	11.3457	2.79742	0.207987	96.36
	(xi) Lake Getvaltjärnen 9-9.5 cm (Davies et al., 2007)														(xi) Lake Getvaltjärnen 9-9.5 cm (Davies et al., 2007)
	n	SiO2	TiO2	Al2O3	FeO	MnO	MgO	CaO	Na2O	K2O	P2O5	Cl	Total Oxides		n	SiO2	TiO2	Al2O3	FeO	MgO	CaO	Na2O	K2O	Total Oxides
	1	50.55	1.94	13.86	12.03	0.26	6.72	11.31	2.65	0.27	0.29	N/A	99.87		1	50.8961	1.95328	13.9549	12.1124	6.76601	11.3874	2.66814	0.271849	99.87
	2	49.81	1.73	13.84	12.43	0.23	6.82	11.47	2.48	0.22	0.33	N/A	99.36		2	50.415	1.75101	14.0081	12.581	6.90283	11.6093	2.51012	0.222672	99.36
	3	50	1.87	13.58	12.88	0.22	6.44	11.11	2.54	0.25	0.31	N/A	99.19		3	50.6791	1.8954	13.7644	13.0549	6.52747	11.2609	2.5745	0.253395	99.19
	4	49.52	1.89	13.52	13	0.18	6.58	11.31	2.58	0.26	0.33	N/A	99.16		4	50.1977	1.91586	13.705	13.1779	6.67005	11.4648	2.61531	0.263558	99.16
	5	49.95	1.76	13.77	12.33	0.22	6.66	11.33	2.47	0.2	0.3	N/A	98.99		5	50.7261	1.78735	13.984	12.5216	6.76348	11.506	2.50838	0.203108	98.99
	6	49.48	1.79	14.83	11.7	0.19	6.3	11.64	2.48	0.18	0.29	N/A	98.85		6	50.2999	1.81966	15.0757	11.8939	6.40439	11.8329	2.52109	0.182983	98.85
	7	50.02	1.83	14.26	10.68	0.25	7.01	11.65	2.66	0.15	0.32	N/A	98.84		7	50.9006	1.86222	14.511	10.868	7.13341	11.8551	2.70683	0.152641	98.84
	8	49.13	1.94	13.43	12.9	0.25	6.81	11.11	2.63	0.2	0.3	N/A	98.7		8	50.056	1.97657	13.6831	13.1431	6.93836	11.3194	2.67957	0.20377	98.7
	9	49	1.9	13.6	12.55	0.26	6.69	11.21	2.56	0.26	0.29	N/A	98.33		9	50.1125	1.94314	13.9088	12.8349	6.84189	11.4645	2.61812	0.265903	98.33
	10	49.1	2.01	13.3	13.02	0.27	6.5	10.93	2.58	0.26	0.31	N/A	98.26		10	50.2662	2.05774	13.6159	13.3292	6.65438	11.1896	2.64128	0.266175	98.26
	11	49.31	1.89	13.37	12.69	0.24	6.52	10.9	2.6	0.23	0.26	N/A	98		11	50.5744	1.93846	13.7128	13.0154	6.68718	11.1795	2.66667	0.235897	98
	12	48.68	1.94	13.25	12.18	0.17	6.42	10.55	2.58	0.29	0.34	N/A	96.42		12	50.7559	2.02273	13.815	12.6994	6.69378	10.9999	2.69002	0.302367	96.42

## Sheet: Table S5 - Stat. Dis. Comps.
	Table S5: Statistical distance comparisons between the composition of the TUNU2013 78.655 m tephra analysed in this study (Table S1b) and the composition of each occurrence of the V1477 tephra layer from Table S3b. Major oxides with normalised average compositions >0.1 %wt were utilised within the comparison following the methodology of Perkins et al. (1995, 1998). 8 elements were used for the co…
	TUNU2013 78.655 m (this study)		D2
	V-1477, Svartárvatn (Larsen et al., 2002)		13.23
	V-1477, Helluvaðstjörn (Lawson et al., 2007)		19.54
	V-1477, Skaftártunga (Streeter and Dugmore, 2014)		10.21
	V-1477, Hvítárvatn (Larsen et al., 2011)		21.86
	V-1477, Gripdeild (Bergþórsdóttir, 2014)		22.42
	V-1477, Lake Lögurinn (Gudmundsdóttir et al., 2016)		19.53
	V1477, Vatnajökull sites compilation (Óladóttir et al., 2011)		22.24
	MD99-2275 179 cm (Larsen et al., 2002)		19.01
	MD99-2275 177-178 cm (Gudmundsdóttir et al., 2011)		21.91
	MOR-T1, An Loch Mór (Chambers et al., 2004)		13.72
	Lake Getvaltjärnen (Davies et al., 2007)		13.36
			CV = 20.09

## Sheet: Table S6 - Sim. Coeff. Comps.
	Table S6: Similarity coefficient comparisons between the average composition of the TUNU2013 78.655 m tephra analysed in this study (Table S1b) and occurrences of the V1477 tephra layer (Table S3b). Major oxides with normalised concentrations >1 % were utilised following the methodology of Borchardt et al. (1972).Red text denotes SC values between 0.97 and 0.999 grey text shows SC values less tha…
		TUNU2013 78.655 m	Svartárvatn	Helluvaðstjörn	Skaftártunga	Hvítárvatn	Gripdeild	Lake Lögurinn	Vatnajökull comp.	2275 179 cm	2275 177-178 cm	MOR-T1, An Loch Mór	Lake Getvaltjärnen
	TUNU2013 78.655 m (this study)	1
	V1477, Svartárvatn (Larsen et al., 2002)	0.933965	1
	V1477, Helluvaðstjörn (Lawson et al., 2007)	0.955557	0.973378	1
	V1477, Skaftártunga (Streeter and Dugmore, 2014)	0.935178	0.971911	0.97293	1
	V1477, Hvítárvatn (Larsen et al., 2011)	0.946989	0.975851	0.989334	0.980461	1
	V1477, Gripdeild (Bergþórsdóttir, 2014)	0.951661	0.97644	0.986781	0.98203	0.984318	1
	V1477, Lake Lögurinn (Gudmundsdóttir et al., 2016)	0.947816	0.978659	0.981996	0.985432	0.984256	0.987938	1
	V1477, Vatnajökull sites compilation (Óladóttir et al., 2011)	0.94	0.981	0.98	0.977	0.986	0.977	0.985	1
	MD99-2275 179 cm (Larsen et al., 2002)	0.925662	0.98257	0.962227	0.977839	0.96806	0.971132	0.973898	0.974	1
	MD99-2275 177-178 cm (Gudmundsdóttir et al., 2011)	0.917009	0.962496	0.950492	0.970032	0.95846	0.95549	0.964828	0.97	0.976333	1
	MOR-T1, An Loch Mór (Chambers et al., 2004)	0.953023	0.973675	0.981251	0.980204	0.981381	0.989841	0.989023	0.978	0.967894	0.955969	1
	Lake Getvaltjärnen (Davies et al., 2007)	0.95666	0.967859	0.990608	0.970466	0.984517	0.982581	0.981614	0.982	0.959047	0.95273	0.988235	1

## Sheet: Table S7 - Ann. nssS and part.
	Table S7: Average annual non-sea-salt sulphur concentrations and insoluble particles (4.5-9.5 µm diameter) mass from the TUNU2013 ice-core between 1500-1450 CE (75.787-82.204 m depth). Used for Figure 3a.
	Year (CE)	Depth (m)	Non-sea-salt sulphur (ng/g)	Insoluble particles (4.5-9.5 µm) mass (µg/g)
	1500	75.7872	16.771	0.00534833
	1499	75.8984	14.211	0.00612083
	1498	76.0269	15.747	0.0165267
	1497	76.1735	43.953	0.0358642
	1496	76.3004	20.626	0.00980583
	1495	76.3967	15.45	0.01127
	1494	76.5305	16.882	0.00475
	1493	76.6716	16.524	0.0209608
	1492	76.7648	39.107	0.0115433
	1491	76.8998	19.758	0.00901222
	1490	77.0476	17.356	0.036295
	1489	77.1557	9.3562	0.00591917
	1488	77.2425	6.1605	0.00184417
	1487	77.3375	11.602	0.00828917
	1486	77.4811	13.867	0.0125275
	1485	77.6302	17.401	0.0530325
	1484	77.7354	16.778	0.0124608
	1483	77.8271	19.018	0.0126992
	1482	77.9342	17.299	0.0137375
	1481	78.0793	33.045	0.0111808
	1480	78.2211	32.569	0.0146458
	1479	78.3636	29.537	0.0652433
	1478	78.4791	26.15	0.00682417
	1477	78.555	83.047	0.100677
	1476	78.6913	35.283	0.01282
	1475	78.8532	18.936	0.00560833
	1474	79.0127	11.967	0.0242125
	1473	79.1395	11.584	0.00897
	1472	79.262	15.053	0.00990583
	1471	79.4791	11.354	0.00693833
	1470	79.7192	47.439	0.0194367
	1469	79.8573	32.882	0.0124083
	1468	79.9643	14.955	0.0361618
	1467	80.1069	12.988	0.0178171
	1466	80.2486	11.49	0.01039
	1465	80.3791	24.953	0.0158658
	1464	80.51	29.285	0.0226808
	1463	80.6421	12.769	0.00886
	1462	80.7616	16.201	0.0166
	1461	80.8787	34.124	0.0159775
	1460	80.9942	73.9	0.0054775
	1459	81.0973	55.953	0.0166117
	1458	81.2076	13.81	0.00821583
	1457	81.3346	17.043	0.0104683
	1456	81.4584	21.605	0.00809167
	1455	81.5414	19.15	0.00383167
	1454	81.6109	32.898	0.0132442
	1453	81.6918	73.293	0.0152492
	1452	81.8505	18.554	0.0119808
	1451	82.0272	28.477	0.0128725
	1450	82.2038	22.773	0.0044775

## Sheet: Table S8 - Mont. nssS and part.
	Table S8: Average monthly non-sea-salt sulphur concentrations and insoluble particles (4.5-9.5 µm diameter) mass from the TUNU2013 ice-core between 1485-1470 CE (77.641-79.804 m depth). Used for Figure 3b.
	Year (CE)	Depth (m)	Non-sea-salt sulphur (ng/g)	Insoluble particles (4.5-9.5 µm) mass (µg/g)
	1485	77.6412	20.4078	0.02088
	1484.92	77.6517	20.5703	0.01967
	1484.83	77.6621	20.6652	0.02071
	1484.75	77.6725	19.6833	0.018
	1484.67	77.6829	18.5916	0.01621
	1484.58	77.6932	17.7327	0.016
	1484.5	77.7036	17.3202	0.01772
	1484.42	77.714	16.4352	0.0189
	1484.33	77.7245	14.8771	0.02846
	1484.25	77.7349	13.1449	0.0132
	1484.17	77.7452	11.7185	0.00893
	1484.08	77.7556	11.5447	0.00488
	1484	77.766	12.221	0.0031
	1483.92	77.7764	13.6377	0.00471
	1483.83	77.7868	14.118	0.01193
	1483.75	77.7973	13.8531	0.02163
	1483.67	77.8076	13.3777	0.00868
	1483.58	77.818	13.5349	0.00441
	1483.5	77.8284	15.1233	0.00469
	1483.42	77.8388	16.7779	0.01293
	1483.33	77.8492	16.7289	0.01932
	1483.25	77.8596	15.34	0.01608
	1483.17	77.87	13.0371	0.01351
	1483.08	77.8803	11.0785	0.012
	1483	77.8907	10.9678	0.012
	1482.92	77.9012	12.5946	0.00953
	1482.83	77.9116	14.9911	0.00734
	1482.75	77.922	17.8311	0.0105
	1482.67	77.9324	19.2292	0.02312
	1482.58	77.9427	18.567	0.02623
	1482.5	77.9531	17.9166	0.0195
	1482.42	77.9635	17.1945	0.00348
	1482.33	77.974	17.3755	0.00727
	1482.25	77.9844	17.8449	0.0305
	1482.17	77.9948	16.9399	0.01144
	1482.08	78.0051	17.7739	0.00802
	1482	78.0155	18.9797	0.00995
	1481.92	78.0259	22.1471	0.00909
	1481.83	78.0363	25.0916	0.0096
	1481.75	78.0467	24.5139	0.00804
	1481.67	78.057	23.8382	0.01178
	1481.58	78.0675	23.2558	0.00749
	1481.5	78.0779	22.7032	0.01072
	1481.42	78.0883	25.2611	0.01171
	1481.33	78.0987	27.4269	0.00463
	1481.25	78.1091	30.858	0.00647
	1481.17	78.1197	34.3554	0.01472
	1481.08	78.1314	35.3736	0.01936
	1481	78.1438	34.2994	0.01724
	1480.92	78.1561	28.6061	0.01289
	1480.83	78.1685	24.1307	0.00922
	1480.75	78.1808	21.4137	0.00458
	1480.67	78.1933	20.4865	0.01408
	1480.58	78.2056	21.2821	0.03949
	1480.5	78.2179	24.2659	0.03976
	1480.42	78.2303	28.7248	0.01947
	1480.33	78.2426	35.7177	0.01216
	1480.25	78.255	39.599	0.013
	1480.17	78.2673	40.8087	0.00477
	1480.08	78.2797	39.3794	0.00307
	1480	78.292	37.2387	0.00551
	1479.92	78.3045	37.4441	0.02212
	1479.83	78.3167	38.7963	0.03275
	1479.75	78.3291	40.2078	0.05753
	1479.67	78.3415	41.4127	0.05141
	1479.58	78.3516	40.8746	0.04735
	1479.5	78.3599	38.1277	0.03807
	1479.42	78.3677	34.4524	0.02973
	1479.33	78.3755	30.671	0.0322
	1479.25	78.3832	26.9503	0.07927
	1479.17	78.391	24.0812	0.10804
	1479.08	78.3988	22.4895	0.14899
	1479	78.4065	21.9406	0.20411
	1478.92	78.4142	21.2507	0.24115
	1478.83	78.422	20.1769	0.08101
	1478.75	78.4297	18.6493	0.00717
	1478.67	78.4375	17.1056	0.00351
	1478.58	78.4453	16.1764	0.00205
	1478.5	78.453	17.9085	0.00361
	1478.42	78.4608	19.6494	0.00746
	1478.33	78.4685	21.3798	0.01141
	1478.25	78.4763	23.1579	0.01296
	1478.17	78.484	25.2528	0.00679
	1478.08	78.4918	28.5485	0.00532
	1478	78.4995	33.1272	0.005
	1477.92	78.5073	39.2547	0.005
	1477.83	78.5151	47.3235	0.00509
	1477.75	78.5228	63.6313	0.01589
	1477.67	78.5306	84.4927	0.02344
	1477.58	78.5383	104.367	0.03625
	1477.5	78.546	120.428	0.05932
	1477.42	78.5538	136.286	0.09203
	1477.33	78.5615	147.356	0.19253
	1477.25	78.5709	144.629	0.3751
	1477.17	78.5833	122.073	0.2302
	1477.08	78.5969	87.2408	0.00562
	1477	78.6103	50.6941	0.00294
	1476.92	78.6238	34.2489	0.002
	1476.83	78.6374	25.074	0.00395
	1476.75	78.6508	18.8564	0.00932
	1476.67	78.6642	15.4367	0.02302
	1476.58	78.6779	16.0304	0.03958
	1476.5	78.6913	19.8454	0.03285
	1476.42	78.7047	24.0032	0.01154
	1476.33	78.7183	24.338	0.00867
	1476.25	78.7318	23.223	0.006
	1476.17	78.7452	22.082	0.00702
	1476.08	78.7588	21.9337	0.00571
	1476	78.7723	20.6883	0.00418
	1475.92	78.7859	17.7986	0.00291
	1475.83	78.7993	14.8542	0.00286
	1475.75	78.8127	11.3742	0.00245
	1475.67	78.8262	9.37617	0.00112
	1475.58	78.8398	9.26087	0.002
	1475.5	78.8532	9.54134	0.00118
	1475.42	78.8667	10.5118	0.00168
	1475.33	78.8803	12.2152	0.00395
	1475.25	78.8937	15.1571	0.00474
	1475.17	78.9072	16.9633	0.02091
	1475.08	78.9207	16.2437	0.01585
	1475	78.9342	14.3981	0.00765
	1474.92	78.9477	12.2101	0.00834
	1474.83	78.9612	11.9935	0.00701
	1474.75	78.9747	11.067	0.00206
	1474.67	78.9882	11.1145	0.00337
	1474.58	79.0017	11.7759	0.00267
	1474.5	79.0152	14.5005	0.01153
	1474.42	79.0286	17.6189	0.09155
	1474.33	79.0422	15.1603	0.1352
	1474.25	79.0535	10.2884	0.02
	1474.17	79.0632	7.55323	0.00282
	1474.08	79.0727	7.91131	0.003
	1474	79.0822	8.76055	0.003
	1473.92	79.0918	9.43461	0.00232
	1473.83	79.1013	9.9731	0.002
	1473.75	79.1109	10.6033	0.002
	1473.67	79.1204	11.3385	0.00254
	1473.58	79.13	11.8471	0.0035
	1473.5	79.1395	12.0824	0.00536
	1473.42	79.1491	12.6715	0.00781
	1473.33	79.1586	13.3736	0.01584
	1473.25	79.1681	12.912	0.02707
	1473.17	79.1777	11.2493	0.02098
	1473.08	79.1873	9.08752	0.00977
	1473	79.1968	7.96982	0.00845
	1472.92	79.2063	7.93351	0.006
	1472.83	79.2159	8.11015	0.00635
	1472.75	79.2254	9.31432	0.00982
	1472.67	79.2349	10.0084	0.00603
	1472.58	79.2445	11.7129	0.00315
	1472.5	79.254	13.7079	0.0021
	1472.42	79.2635	16.8274	0.00371
	1472.33	79.2731	18.9075	0.004
	1472.25	79.2915	16.2742	0.00905
	1472.17	79.3123	9.2174	0.00153
	1472.08	79.3332	11.8369	0.00463
	1472	79.354	15.2831	0.0625
	1471.92	79.3748	13.1063	0.0259
	1471.83	79.3957	10.6904	0.005
	1471.75	79.4165	10.7105	0.0063
	1471.67	79.4373	8.924	0.00347
	1471.58	79.4582	5.98288	0.0078
	1471.5	79.479	6.862	0.0146
	1471.42	79.5	8.02719	0.0015
	1471.33	79.5207	9.2814	0.00157
	1471.25	79.5417	8.832	0.00267
	1471.17	79.5626	9.73725	0.00452
	1471.08	79.5834	13.2625	0.00316
	1471	79.6042	15.1808	0.00677
	1470.92	79.6251	18.7714	0.03698
	1470.83	79.6459	18.2072	0.01473
	1470.75	79.6667	13.4796	0.0405
	1470.67	79.6876	12.9474	0.00903
	1470.58	79.7084	17.8746	0.00529
	1470.5	79.7292	33.1642	0.003
	1470.42	79.7501	55.7069	0.0263
	1470.33	79.768	47.3088	0.08164
	1470.25	79.778	29.3453	0.01032
	1470.17	79.7868	18.0975	0.00345
	1470.08	79.7956	11.3615	0.001
	1470	79.8045	8.14782	0.001

## Sheet: Table S9 - TUNU2013 Ann. Count 
	Table S9: Average monthly non-sea-salt sulphur, calcium and sodium concentrations and non-sea-salt-sulphur/sodium ratios from the TUNU2013 ice-core between 1490-1440 CE (77.171-83.768 m depth). -0.999 denotes missing data. Used for Figure 5.
	Year (CE)	Depth (m)	Non-sea-salt sulphur (ng/g)	Calcium (ng/g)	Sodium (ng/g)	Non-sea-salt sulphur/sodium (nssS/Na)
	1489.96	77.171	9.02	4.559	32.551	0.277104
	1489.88	77.18	6.93	4.355	28.57	0.242562
	1489.79	77.188	6.8	3.737	23.425	0.290288
	1489.71	77.197	7.65	2.991	16.999	0.450026
	1489.62	77.206	8.59	2.269	12.31	0.697807
	1489.54	77.214	8.88	1.722	9.217	0.963437
	1489.46	77.223	8.91	1.305	6.487	1.37352
	1489.38	77.231	8.96	1.017	4.136	2.16634
	1489.29	77.24	10.09	0.757	2.753	3.66509
	1489.21	77.249	11.53	0.638	2.332	4.94425
	1489.12	77.257	12.25	0.625	2.306	5.31223
	1489.04	77.266	12.41	0.675	2.4	5.17083
	1488.96	77.275	10.66	0.857	2.493	4.27597
	1488.88	77.285	7.84	1.403	2.429	3.22767
	1488.79	77.296	5.97	2.576	2.609	2.28823
	1488.71	77.306	5.28	4.516	3.812	1.3851
	1488.62	77.316	4.88	6.917	6.262	0.779304
	1488.54	77.326	5.43	9.297	10.38	0.523121
	1488.46	77.337	5.76	10.498	14.88	0.387097
	1488.38	77.347	6.03	10.009	17.92	0.336496
	1488.29	77.357	5.16	7.956	19.061	0.27071
	1488.21	77.367	4.26	5.249	18.309	0.232672
	1488.12	77.378	5.31	2.86	16.873	0.314704
	1488.04	77.388	7.28	1.657	15.493	0.46989
	1487.96	77.399	8.31	0.976	13.392	0.62052
	1487.88	77.412	7.76	0.744	9.838	0.788778
	1487.79	77.425	9.45	0.529	5.353	1.76537
	1487.71	77.437	12.79	0.433	2.068	6.18472
	1487.62	77.45	15.72	0.602	0.682	23.0499
	1487.54	77.463	16.3	1.345	1.208	13.4934
	1487.46	77.475	15.69	2.593	2.852	5.5014
	1487.38	77.488	14.08	4.295	5.776	2.43767
	1487.29	77.501	12.16	5.905	9.035	1.34588
	1487.21	77.513	10.01	7.184	12.889	0.776631
	1487.12	77.526	8.56	8.293	18.077	0.47353
	1487.04	77.539	8.28	9.368	24.465	0.338443
	1486.96	77.549	7.65	9.771	27.026	0.283061
	1486.88	77.558	7.92	9.761	25.548	0.310005
	1486.79	77.566	8.08	9.021	20.712	0.390112
	1486.71	77.575	8.85	7.86	14.463	0.611906
	1486.62	77.584	9.33	6.935	8.646	1.07911
	1486.54	77.592	10.27	6.205	4.997	2.05523
	1486.46	77.601	11.68	5.887	4.364	2.67644
	1486.38	77.609	14.1	6.231	6.59	2.13961
	1486.29	77.618	18.79	7.121	10.374	1.81126
	1486.21	77.627	22.96	8.242	14.745	1.55714
	1486.12	77.635	24.6	9.501	19.115	1.28695
	1486.04	77.644	21.01	10.254	22.061	0.952359
	1485.96	77.652	15.41	10.689	23.523	0.655104
	1485.88	77.659	12.2	10.672	23.368	0.522081
	1485.79	77.667	13.45	10.136	21.927	0.613399
	1485.71	77.674	14.82	9.281	19.589	0.756547
	1485.62	77.682	15.83	8.384	17.024	0.929864
	1485.54	77.689	19.23	7.78	15.62	1.23111
	1485.46	77.697	22.01	7.607	16.631	1.32343
	1485.38	77.704	22.29	8.058	21.484	1.03752
	1485.29	77.712	21.21	8.956	31.555	0.67216
	1485.21	77.719	17.86	9.889	42.146	0.423765
	1485.12	77.727	18.17	10.308	49.763	0.365131
	1485.04	77.734	18.66	9.917	51.247	0.364119
	1484.96	77.743	16.43	8.425	46.203	0.355605
	1484.88	77.754	12.75	5.885	32.824	0.388435
	1484.79	77.764	12.56	3.622	18.625	0.674362
	1484.71	77.775	14.94	2.463	10.392	1.43764
	1484.62	77.785	21.61	2.027	7.238	2.98563
	1484.54	77.795	25.6	2.254	5.235	4.89016
	1484.46	77.806	24.63	2.953	3.826	6.43753
	1484.38	77.816	20.27	4.15	3.514	5.76836
	1484.29	77.827	18.15	6.302	5.445	3.33333
	1484.21	77.837	16.22	9.374	9.445	1.71731
	1484.12	77.847	11.93	11.69	14.017	0.851109
	1484.04	77.858	7.58	13.136	18.735	0.40459
	1483.96	77.866	4.68	13.378	21.207	0.220682
	1483.88	77.872	4.51	12.977	21.865	0.206266
	1483.79	77.878	8.35	12.162	22.654	0.368588
	1483.71	77.884	13.25	11.36	23.405	0.566118
	1483.62	77.89	15.69	10.632	24.575	0.638454
	1483.54	77.896	17.32	10.007	27.107	0.638949
	1483.46	77.901	19.28	9.562	30.945	0.623041
	1483.38	77.907	24.03	9.353	35.553	0.675892
	1483.29	77.913	30.37	9.403	40.222	0.755059
	1483.21	77.919	33.49	9.561	43.183	0.775537
	1483.12	77.925	30.71	9.66	43.368	0.708126
	1483.04	77.931	24.5	9.559	40.67	0.60241
	1482.96	77.938	15.32	8.971	34.182	0.448189
	1482.88	77.947	10.2	7.719	23.164	0.440338
	1482.79	77.956	11.31	5.961	12.261	0.922437
	1482.71	77.965	11.98	4.38	5.814	2.06054
	1482.62	77.973	14.15	3.384	4.305	3.28688
	1482.54	77.982	16.95	3.168	5.847	2.89892
	1482.46	77.991	14.58	3.468	8.585	1.69831
	1482.38	78	14.46	4.173	12.835	1.12661
	1482.29	78.008	22.58	5.046	19.106	1.18183
	1482.21	78.017	25.63	5.892	26.396	0.97098
	1482.12	78.026	23.45	6.619	33.502	0.699958
	1482.04	78.035	25.46	6.713	36.775	0.692318
	1481.96	78.044	26.11	5.901	33.211	0.786185
	1481.88	78.055	23.91	4.401	23.553	1.01516
	1481.79	78.066	22.56	2.986	12.651	1.78326
	1481.71	78.077	22.38	2.078	4.2	5.32857
	1481.62	78.087	21.7	2.008	1.075	20.186
	1481.54	78.098	23.25	2.76	1.125	20.6667
	1481.46	78.109	28.82	4.19	2.121	13.5879
	1481.38	78.12	35.58	5.723	4.249	8.37373
	1481.29	78.13	41.57	6.681	8.492	4.8952
	1481.21	78.141	46.25	6.51	14.106	3.27875
	1481.12	78.152	49.88	5.135	17.811	2.80052
	1481.04	78.163	51.53	3.47	17.873	2.88312
	1480.96	78.174	48.98	2.133	13.979	3.50383
	1480.88	78.187	35.76	1.652	7.924	4.51287
	1480.79	78.2	24.3	2.143	4.166	5.83293
	1480.71	78.213	25.36	3.011	2.451	10.3468
	1480.62	78.225	32.02	4.018	2.527	12.6712
	1480.54	78.238	34.61	4.535	4.561	7.58825
	1480.46	78.251	35.4	4.486	7.363	4.80782
	1480.38	78.264	35.48	4.203	9.799	3.62078
	1480.29	78.276	31.21	4.359	12.018	2.59694
	1480.21	78.289	27.31	6.07	19.041	1.43427
	1480.12	78.302	28.59	10.499	43.766	0.653247
	1480.04	78.315	33.74	19.212	91.691	0.367975
	1479.96	78.325	36.09	26.12	130.93	0.275643
	1479.88	78.332	35.42	29.747	151.97	0.233072
	1479.79	78.339	35.2	31.339	158.52	0.222054
	1479.71	78.347	39.08	30.069	146.55	0.266667
	1479.62	78.354	41.83	26.399	121.53	0.344195
	1479.54	78.361	40.43	21.472	90.398	0.447244
	1479.46	78.369	32.61	16.385	60.286	0.540922
	1479.38	78.376	25.01	11.92	34.791	0.718864
	1479.29	78.383	20.51	8.97	20.223	1.01419
	1479.21	78.391	19.03	7.054	13.442	1.41571
	1479.12	78.398	17.34	6.008	13.709	1.26486
	1479.04	78.405	14.69	5.831	16.743	0.877382
	1478.96	78.413	12.01	5.729	20.164	0.595616
	1478.88	78.419	11.71	5.405	23.732	0.493427
	1478.79	78.426	12.42	4.82	26.78	0.463779
	1478.71	78.434	13.8	4.104	28.677	0.481222
	1478.62	78.44	15.46	3.537	30.408	0.508419
	1478.54	78.447	24.12	3.394	33.647	0.716854
	1478.46	78.455	33.73	3.458	37.952	0.888754
	1478.38	78.461	41.83	3.724	41.96	0.996902
	1478.29	78.468	41.06	4.083	45.641	0.89963
	1478.21	78.476	37.31	4.309	48.441	0.770215
	1478.12	78.482	34.19	4.277	49.598	0.689342
	1478.04	78.489	33.59	4.044	49.312	0.681173
	1477.96	78.502	34.13	4.165	46.137	0.739753
	1477.88	78.518	33.09	7.326	39.08	0.846725
	1477.79	78.535	33.08	18.437	28.087	1.17777
	1477.71	78.552	39.88	33.247	25.095	1.58916
	1477.62	78.569	59.94	37.085	30.348	1.97509
	1477.54	78.586	83.8	22.911	28.402	2.9505
	1477.46	78.603	102.8	8.2	17.219	5.97015
	1477.38	78.62	138.86	4.612	7.983	17.3945
	1477.29	78.637	156.63	9.528	11.214	13.9674
	1477.21	78.654	129.63	13.721	20.271	6.39485
	1477.12	78.671	92.42	17.24	33.193	2.78432
	1477.04	78.687	85.14	16.771	38.055	2.23729
	1476.96	78.706	72.34	12.539	33.266	2.17459
	1476.88	78.725	51.66	7.209	27.896	1.85188
	1476.79	78.744	33.01	4.854	24.16	1.36631
	1476.71	78.763	24.6	4.268	22.684	1.08446
	1476.62	78.783	25.63	4.284	22.639	1.13212
	1476.54	78.802	31.45	3.542	14.5	2.16897
	1476.46	78.821	35.14	1.962	4.483	7.8385
	1476.38	78.84	36.71	1.142	0.656	55.9604
	1476.29	78.86	34.05	1.478	0.483	70.4969
	1476.21	78.879	29.03	3.579	1.774	16.3641
	1476.12	78.898	27.93	7.894	5.948	4.6957
	1476.04	78.917	28.37	9.764	9.863	2.87641
	1475.96	78.933	27.45	7.938	9.342	2.93834
	1475.88	78.945	27.81	5.522	6.278	4.42975
	1475.79	78.956	28.33	3.816	3.561	7.95563
	1475.71	78.968	30.69	2.908	1.575	19.4857
	1475.62	78.98	31.75	2.682	0.75	42.3333
	1475.54	78.992	16.43	3.796	1.083	15.1708
	1475.46	79.003	9.07	6.899	2.813	3.22432
	1475.38	79.015	7.89	12.083	6.69	1.17937
	1475.29	79.027	7.04	17.148	11.794	0.596914
	1475.21	79.039	10.7	17.644	14.76	0.724932
	1475.12	79.05	15.51	12.103	14.605	1.06197
	1475.04	79.062	17.21	4.613	12.21	1.4095
	1474.96	79.075	14.54	2.233	12.672	1.14741
	1474.88	79.089	10.34	2.495	14.446	0.715769
	1474.79	79.103	7.6	2.749	14.225	0.534271
	1474.71	79.118	8.35	2.485	9.484	0.88043
	1474.62	79.132	10.47	2.092	3.534	2.96265
	1474.54	79.146	12.27	3.317	2.731	4.49286
	1474.46	79.16	14.75	5.124	5.312	2.77673
	1474.38	79.174	17.39	4.72	7.012	2.48003
	1474.29	79.188	17.12	2.992	6.865	2.49381
	1474.21	79.203	12.8	2.47	7.699	1.66255
	1474.12	79.217	8.94	2.658	12.483	0.716174
	1474.04	79.231	9.34	3.266	21.251	0.439509
	1473.96	79.243	9.54	3.906	25.266	0.377583
	1473.88	79.253	8.05	4.489	25.154	0.320029
	1473.79	79.263	7.19	4.861	24.777	0.290188
	1473.71	79.272	7.87	4.993	23.896	0.329344
	1473.62	79.282	10.59	4.455	19.797	0.53493
	1473.54	79.292	12.07	3.343	12.054	1.00133
	1473.46	79.302	11.66	2.232	5.188	2.24749
	1473.38	79.312	12.29	1.71	1.626	7.55843
	1473.29	79.322	14.27	2.615	2.822	5.0567
	1473.21	79.331	13.71	4.945	8.407	1.63078
	1473.12	79.341	14.73	8.221	18.529	0.79497
	1473.04	79.351	15.71	10.483	28.939	0.542866
	1472.96	79.36	13.12	10.799	31.945	0.410706
	1472.88	79.369	8.7	9.628	27.196	0.3199
	1472.79	79.377	9.64	7.755	17.609	0.547447
	1472.71	79.385	11.96	6.191	8.717	1.37203
	1472.62	79.394	11.92	5.147	3.545	3.36248
	1472.54	79.402	12.13	4.589	1.93	6.28497
	1472.46	79.411	17.58	4.435	1.63	10.7853
	1472.38	79.419	25.39	4.29	1.621	15.6632
	1472.29	79.428	25.63	4.149	1.737	14.7553
	1472.21	79.436	18.4	4.104	2.289	8.03844
	1472.12	79.444	13.2	3.966	3.352	3.93795
	1472.04	79.453	13.15	3.748	4.666	2.81826
	1471.96	79.466	12.97	2.792	4.641	2.79466
	1471.88	79.485	11.76	1.307	1.832	6.41921
	1471.79	79.503	8.33	0.913	0.528	15.7765
	1471.71	79.522	5.84	0.957	0.446	13.0942
	1471.62	79.54	7.89	0.817	0.421	18.7411
	1471.54	79.558	9.72	0.675	0.573	16.9634
	1471.46	79.577	9.98	1.272	1.127	8.85537
	1471.38	79.595	13.09	2.907	2.208	5.92844
	1471.29	79.613	15.94	6.554	4.894	3.25705
	1471.21	79.632	17.99	12.297	7.369	2.44131
	1471.12	79.65	13.89	15.188	10.467	1.32703
	1471.04	79.669	9.54	11.93	20.668	0.461583
	1470.96	79.683	13.16	7.107	22.607	0.582121
	1470.88	79.692	20.47	4.157	16.168	1.26608
	1470.79	79.701	29.73	2.434	7.739	3.84158
	1470.71	79.71	38.69	1.923	2.642	14.6442
	1470.62	79.72	47.38	2.116	1.292	36.6718
	1470.54	79.729	55.25	3.713	1.552	35.5992
	1470.46	79.738	62.34	7.522	2.587	24.0974
	1470.38	79.747	70.72	13.596	4.748	14.8947
	1470.29	79.757	69.25	19.293	8.021	8.63359
	1470.21	79.766	63.04	20.632	10.662	5.91259
	1470.12	79.775	51.74	16.354	10.787	4.79651
	1470.04	79.784	43.95	9.202	7.829	5.61374
	1469.96	79.793	31.29	3.811	4.298	7.28013
	1469.88	79.801	15.54	1.212	1.756	8.84966
	1469.79	79.808	11.26	0.513	0.651	17.2965
	1469.71	79.816	9.06	0.399	0.284	31.9014
	1469.62	79.824	8.7	0.531	0.25	34.8
	1469.54	79.832	12.06	0.904	0.431	27.9814
	1469.46	79.839	26.57	1.607	0.89	29.8539
	1469.38	79.847	84.47	2.871	2.068	40.8462
	1469.29	79.855	104.11	4.96	4.989	20.8679
	1469.21	79.863	44.41	6.758	8.956	4.95869
	1469.12	79.87	24.93	7.703	12.858	1.93887
	1469.04	79.878	24.98	6.96	13.986	1.78607
	1468.96	79.885	16.66	5.724	12.488	1.33408
	1468.88	79.89	10.29	4.946	9.814	1.0485
	1468.79	79.896	6.43	4.834	7.024	0.915433
	1468.71	79.902	5.63	5.676	5.038	1.11751
	1468.62	79.907	8.48	7.465	4.334	1.95662
	1468.54	79.913	12.11	9.58	5.251	2.30623
	1468.46	79.918	15.28	11.282	7.618	2.00578
	1468.38	79.924	19.67	12.215	10.568	1.86128
	1468.29	79.929	21.01	12.208	13.238	1.5871
	1468.21	79.935	20.54	11.241	14.698	1.39747
	1468.12	79.941	20.97	9.18	14.778	1.419
	1468.04	79.946	22.41	7.094	13.585	1.64961
	1467.96	79.954	17.86	5.485	11.624	1.53648
	1467.88	79.965	11.07	3.783	7.535	1.46914
	1467.79	79.975	8.14	3.963	4.143	1.96476
	1467.71	79.985	7.65	6.404	3.266	2.34231
	1467.62	79.996	7.7	9.517	3.286	2.34327
	1467.54	80.006	6.99	7.284	3.542	1.97346
	1467.46	80.016	8.65	6.284	3.756	2.30298
	1467.38	80.027	12.94	-0.999	-0.999	-0.999
	1467.29	80.037	19.47	-0.999	-0.999	-0.999
	1467.21	80.047	22.68	-0.999	-0.999	-0.999
	1467.12	80.058	19.31	-0.999	-0.999	-0.999
	1467.04	80.068	14.31	5.166	5.633	2.54039
	1466.96	80.08	10.07	4.843	9.41	1.07014
	1466.88	80.093	7.51	4.435	14.566	0.515584
	1466.79	80.106	11.73	5.297	6.596	1.77835
	1466.71	80.119	10.32	8.461	3.863	2.6715
	1466.62	80.132	6.96	13.381	4.46	1.56054
	1466.54	80.145	7.16	17.406	7.887	0.907823
	1466.46	80.159	6.87	18.618	11.7	0.587179
	1466.38	80.172	7.35	15.117	13.993	0.525263
	1466.29	80.185	8.75	11.066	15.202	0.575582
	1466.21	80.198	10.97	8.337	15.443	0.710354
	1466.12	80.211	20.49	6.196	15.743	1.30153
	1466.04	80.224	27.32	4.188	16.102	1.69668
	1465.96	80.237	21.75	3.646	14.638	1.48586
	1465.88	80.248	15.98	3.317	11.959	1.33623
	1465.79	80.26	14.82	2.564	7.891	1.87809
	1465.71	80.271	16.27	2.824	4.843	3.35949
	1465.62	80.282	20.79	5.04	5.754	3.61314
	1465.54	80.294	27.12	7.219	7.893	3.43596
	1465.46	80.305	31.07	8.037	10.036	3.09585
	1465.38	80.317	31.79	9.475	13.786	2.30596
	1465.29	80.328	30.34	9.125	18.54	1.63646
	1465.21	80.34	29.77	6.639	22.281	1.33612
	1465.12	80.351	29.83	5.5	23.319	1.27921
	1465.04	80.362	29.39	4.778	23.683	1.24097
	1464.96	80.372	27.4	3.653	22.499	1.21783
	1464.88	80.38	24.16	2.893	18.91	1.27763
	1464.79	80.388	24.39	2.635	13.632	1.78917
	1464.71	80.396	28.04	2.742	9.181	3.05413
	1464.62	80.404	30.8	3.158	5.837	5.27668
	1464.54	80.412	30	4.096	3.56	8.42697
	1464.46	80.42	25.53	5.229	2.95	8.65424
	1464.38	80.428	21.77	6.544	3.39	6.42183
	1464.29	80.436	23.67	7.681	4.175	5.66946
	1464.21	80.444	30.43	8.584	5.13	5.93177
	1464.12	80.452	39.12	9.37	6.137	6.37445
	1464.04	80.46	44.16	10.024	7.082	6.23553
	1463.96	80.47	38.76	10.824	8.163	4.74825
	1463.88	80.481	24.43	12.938	10.227	2.38877
	1463.79	80.493	12.69	17.406	15.215	0.834045
	1463.71	80.505	8.56	23.376	22.806	0.37534
	1463.62	80.516	6.35	29.544	31.844	0.19941
	1463.54	80.528	5.76	34.081	39.974	0.144094
	1463.46	80.539	7.31	37.795	46.856	0.15601
	1463.38	80.551	10.43	41.327	52.323	0.199339
	1463.29	80.562	11.69	43.754	54.177	0.215774
	1463.21	80.574	11.2	42.457	50.712	0.220855
	1463.12	80.586	10.2	36.613	41.706	0.244569
	1463.04	80.597	10.01	25.167	29.057	0.344495
	1462.96	80.61	9.8	13.6	17.808	0.550314
	1462.88	80.623	9.44	5.635	10.48	0.900763
	1462.79	80.637	9.55	2.433	5.922	1.61263
	1462.71	80.651	10.95	1.893	2.891	3.78762
	1462.62	80.664	14.2	1.75	1.133	12.5331
	1462.54	80.678	18.23	1.62	0.653	27.9173
	1462.46	80.691	21.29	1.761	0.644	33.059
	1462.38	80.705	21.33	2.45	0.907	23.5171
	1462.29	80.718	20.01	4.136	2.113	9.46995
	1462.21	80.732	19.48	6.809	7.145	2.72638
	1462.12	80.746	19.82	10.979	18.963	1.04519
	1462.04	80.759	19.2	14.401	34.223	0.561026
	1461.96	80.771	18.25	14.581	38.5	0.474026
	1461.88	80.78	18.63	12.756	34.744	0.536208
	1461.79	80.789	20.56	9.711	26.062	0.788888
	1461.71	80.798	27.57	6.784	14.906	1.84959
	1461.62	80.807	38.92	5.395	6.814	5.71177
	1461.54	80.816	44.75	5.889	3.464	12.9186
	1461.46	80.825	40.05	7.889	4.221	9.48827
	1461.38	80.834	32.66	10.64	7.034	4.64316
	1461.29	80.843	35.23	12.905	11.076	3.18075
	1461.21	80.852	39.96	13.721	15.231	2.6236
	1461.12	80.861	41.37	12.953	18.15	2.27934
	1461.04	80.87	44.22	11.069	19.237	2.2987
	1460.96	80.88	49.75	8.129	18.382	2.70645
	1460.88	80.89	51.82	5.18	15.341	3.37788
	1460.79	80.901	50.23	3.465	11.252	4.4641
	1460.71	80.911	54.93	2.453	7.867	6.98233
	1460.62	80.921	69.17	1.991	5.834	11.8564
	1460.54	80.931	83.7	2.163	7.233	11.572
	1460.46	80.942	94.36	2.911	14.102	6.69125
	1460.38	80.952	98.49	3.837	25.275	3.89674
	1460.29	80.962	94.64	4.469	37.279	2.53869
	1460.21	80.972	85.69	4.669	46.9	1.82708
	1460.12	80.983	78.52	4.547	54.78	1.43337
	1460.04	80.993	72.98	4.253	59.321	1.23026
	1459.96	81.004	73.7	4.021	58.628	1.25708
	1459.88	81.017	72.1	3.87	49.905	1.44475
	1459.79	81.029	66.1	3.652	34.29	1.92768
	1459.71	81.041	62.78	3.958	16.259	3.86125
	1459.62	81.054	63.45	5.596	5.577	11.3771
	1459.54	81.066	64.9	9.178	4.066	15.9616
	1459.46	81.079	68.22	14.113	7.924	8.60929
	1459.38	81.091	66.37	18.486	13.828	4.79968
	1459.29	81.103	54.6	19.642	19.74	2.76596
	1459.21	81.116	41.24	16.716	22.98	1.7946
	1459.12	81.128	28	11.572	23.086	1.21286
	1459.04	81.141	17.72	6.428	21.113	0.839293
	1458.96	81.151	11.13	4.084	19.359	0.574926
	1458.88	81.16	8.48	3.757	18.361	0.461848
	1458.79	81.168	9.41	4.064	16.737	0.562227
	1458.71	81.177	10.62	4.842	14.546	0.730098
	1458.62	81.185	14.11	5.941	12.239	1.15287
	1458.54	81.194	18.26	7.387	11.029	1.65564
	1458.46	81.202	18.27	9.025	10.942	1.66971
	1458.38	81.211	14.45	10.839	12.456	1.16008
	1458.29	81.219	12.87	12.201	15.457	0.832632
	1458.21	81.228	13.17	12.789	18.253	0.721525
	1458.12	81.236	16.12	12.395	20.052	0.80391
	1458.04	81.245	18	11.028	20.519	0.877236
	1457.96	81.256	16.6	8.805	19.943	0.832372
	1457.88	81.269	12.63	6.766	18.724	0.674535
	1457.79	81.282	9.36	6.696	17.804	0.525725
	1457.71	81.295	6.64	6.91	15.03	0.441783
	1457.62	81.309	6.24	6.037	10.23	0.609971
	1457.54	81.322	7.87	4.587	5.511	1.42805
	1457.46	81.335	14.39	4.63	3.232	4.45235
	1457.38	81.348	22.98	6.91	3.952	5.81478
	1457.29	81.362	30.08	10.377	7.502	4.0096
	1457.21	81.375	31.52	12.476	13.503	2.3343
	1457.12	81.388	27.38	11.8	22.864	1.19752
	1457.04	81.401	19.18	9.096	31.413	0.610575
	1456.96	81.412	14.25	6.851	33.599	0.42412
	1456.88	81.42	15.23	5.764	31.173	0.488564
	1456.79	81.428	16.17	5.312	25.617	0.631221
	1456.71	81.436	14.84	5.55	18.802	0.789278
	1456.62	81.444	15.37	6.759	13.398	1.14719
	1456.54	81.451	24.71	8.688	10.777	2.29285
	1456.46	81.459	33.32	10.77	10.78	3.09091
	1456.38	81.467	32.15	12.742	12.744	2.52276
	1456.29	81.475	24.79	13.636	15.15	1.6363
	1456.21	81.483	22.55	13.444	16.585	1.35966
	1456.12	81.491	22.93	12.234	16.727	1.37084
	1456.04	81.499	22.46	10.452	15.574	1.44215
	1455.96	81.508	21.44	8.308	13.485	1.58991
	1455.88	81.518	20.71	6.364	10.81	1.91582
	1455.79	81.528	18.23	5.228	8.07	2.25898
	1455.71	81.537	14.49	4.339	5.721	2.53277
	1455.62	81.547	11.8	3.614	3.748	3.14835
	1455.54	81.557	11.23	3.404	2.553	4.39875
	1455.46	81.567	13.24	3.946	2.637	5.02086
	1455.38	81.577	16.23	5.191	4.971	3.26494
	1455.29	81.587	19.38	7.136	11.287	1.71702
	1455.21	81.596	23.41	8.937	20.172	1.16052
	1455.12	81.606	27.73	9.973	30.766	0.90132
	1455.04	81.616	30.86	10.53	38.879	0.793745
	1454.96	81.626	31.8	10.253	41.213	0.771601
	1454.88	81.636	29.83	9.46	37.272	0.800333
	1454.79	81.645	26.83	9.151	29.17	0.919781
	1454.71	81.655	25.47	9.887	20.024	1.27197
	1454.62	81.665	27.32	12.141	14.632	1.86714
	1454.54	81.675	30.71	15.717	14.414	2.13057
	1454.46	81.684	32.63	18.947	17.949	1.81793
	1454.38	81.694	32.56	20.647	24.439	1.3323
	1454.29	81.704	33.94	19.885	30.621	1.10839
	1454.21	81.714	37.48	18.12	35.611	1.05248
	1454.12	81.723	41.64	16.116	39.44	1.05578
	1454.04	81.733	43.03	14.949	41.547	1.03569
	1453.96	81.742	44.51	14.521	40.977	1.08622
	1453.88	81.751	47.68	14.484	39.798	1.19805
	1453.79	81.759	53.1	14.302	36.148	1.46896
	1453.71	81.768	60.33	14.455	31.367	1.92336
	1453.62	81.776	68.8	15.487	26.114	2.6346
	1453.54	81.785	81.17	18.083	22.323	3.63616
	1453.46	81.793	92.07	20.938	20.362	4.52166
	1453.38	81.802	101.43	23.227	20.983	4.83391
	1453.29	81.81	103.61	22.905	24.807	4.17664
	1453.21	81.819	95.01	20.382	28.544	3.32855
	1453.12	81.827	76.63	16.076	30.498	2.51262
	1453.04	81.836	54.24	11.151	28.908	1.8763
	1452.96	81.845	33.22	6.171	23.77	1.39756
	1452.88	81.855	22.07	2.918	16.388	1.34672
	1452.79	81.865	19.69	2.321	12.718	1.5482
	1452.71	81.875	20.42	1.949	8.832	2.31205
	1452.62	81.885	19.92	1.746	4.318	4.61325
	1452.54	81.895	17.96	1.822	3.01	5.96678
	1452.46	81.905	16.38	2.274	3.63	4.5124
	1452.38	81.915	15.87	2.758	4.476	3.54558
	1452.29	81.925	16.3	3.233	5.863	2.78015
	1452.21	81.935	16.68	4.176	8.884	1.87753
	1452.12	81.945	16.02	4.478	10.173	1.57476
	1452.04	81.955	12.74	4.059	9.771	1.30386
	1451.96	81.966	10.11	3.683	9.283	1.08909
	1451.88	81.979	10	3.084	8.108	1.23335
	1451.79	81.992	12.57	2.175	5.512	2.28048
	1451.71	82.005	16.58	1.619	3.767	4.40138
	1451.62	82.017	18.14	2.529	4.503	4.02843
	1451.54	82.03	20.23	4.788	9.328	2.16874
	1451.46	82.043	30.97	8.34	21.085	1.46882
	1451.38	82.056	45.26	11.864	35.928	1.25974
	1451.29	82.068	49.72	13.402	51.12	0.972613
	1451.21	82.081	44.16	13.334	60.402	0.731102
	1451.12	82.094	39.19	12.467	62.814	0.623905
	1451.04	82.107	41.15	11.635	60.6	0.679043
	1450.96	82.121	42.73	10.143	53.639	0.796622
	1450.88	82.136	40.34	7.02	41.636	0.968873
	1450.79	82.151	34.9	4.022	28.146	1.23996
	1450.71	82.166	26.79	2.552	16.892	1.58596
	1450.62	82.182	17.31	2.279	9.556	1.81143
	1450.54	82.197	11.12	2.407	4.298	2.58725
	1450.46	82.212	11.58	3.432	2.538	4.56265
	1450.38	82.227	17.6	6.24	4.143	4.24813
	1450.29	82.243	22.57	7.753	7.44	3.0336
	1450.21	82.258	19.97	6.522	10.581	1.88735
	1450.12	82.273	14.55	4.275	14.456	1.0065
	1450.04	82.288	16.36	3.921	20.926	0.781803
	1449.96	82.302	17.46	4.586	24.362	0.71669
	1449.88	82.314	17.19	4.934	23.477	0.732206
	1449.79	82.326	17.18	4.827	19.341	0.888268
	1449.71	82.339	21.03	4.522	14.022	1.49979
	1449.62	82.351	23.38	4.929	9.107	2.56726
	1449.54	82.363	24.83	8.523	5.999	4.13902
	1449.46	82.375	29.22	16.584	6.734	4.33917
	1449.38	82.387	32.87	26.896	11.624	2.82777
	1449.29	82.399	27.21	32.991	18.743	1.45174
	1449.21	82.412	19.02	32.199	26.269	0.724047
	1449.12	82.424	15.28	24.848	33.096	0.461687
	1449.04	82.436	14.87	15.839	33.304	0.446493
	1448.96	82.449	14.83	8.822	25.409	0.583651
	1448.88	82.462	12.75	4.904	12.997	0.980996
	1448.79	82.475	10.91	3.475	4.131	2.64101
	1448.71	82.488	8.77	2.628	1.184	7.40709
	1448.62	82.502	6.93	1.927	0.647	10.711
	1448.54	82.515	8.57	1.333	0.548	15.6387
	1448.46	82.528	9.81	1.4	1.158	8.4715
	1448.38	82.541	8.29	2.417	3.774	2.19661
	1448.29	82.555	8.22	4.901	10.352	0.794049
	1448.21	82.568	9.69	6.847	17.92	0.540737
	1448.12	82.581	11.49	6.927	23.833	0.482105
	1448.04	82.594	13.08	5.163	26.212	0.499008
	1447.96	82.606	13.57	3.716	26.566	0.510803
	1447.88	82.617	12.79	3.431	25.41	0.503345
	1447.79	82.627	12.16	3.914	19.707	0.61704
	1447.71	82.638	11.87	3.982	13.286	0.893422
	1447.62	82.648	11.88	3.505	7.051	1.68487
	1447.54	82.659	12.21	4.63	7.444	1.64025
	1447.46	82.669	14.05	5.716	14.333	0.980255
	1447.38	82.68	16.28	6.477	21.035	0.773948
	1447.29	82.69	17.33	6.859	24.786	0.699185
	1447.21	82.701	17.04	6.471	30.406	0.560416
	1447.12	82.711	15.44	6.51	34.189	0.451607
	1447.04	82.722	15.12	7.494	35.108	0.430671
	1446.96	82.736	16.39	7.662	34.741	0.471777
	1446.88	82.753	19.06	6.549	31.061	0.613631
	1446.79	82.77	22.01	4.145	18.223	1.20781
	1446.71	82.787	23.92	1.99	7.653	3.12557
	1446.62	82.804	24.3	0.91	2.373	10.2402
	1446.54	82.821	23.32	0.849	2.103	11.0889
	1446.46	82.839	22.4	1.869	6.926	3.23419
	1446.38	82.856	22.83	2.705	10.02	2.27844
	1446.29	82.873	24.85	3.069	10.521	2.36194
	1446.21	82.89	27.07	3.804	10.553	2.56515
	1446.12	82.907	28.32	8.991	14.519	1.95055
	1446.04	82.924	27.07	26.181	35.872	0.754628
	1445.96	82.94	20.88	43.07	51.216	0.407685
	1445.88	82.954	12.66	47.407	45.551	0.27793
	1445.79	82.969	10.14	44.414	34.401	0.294759
	1445.71	82.983	11.5	37.376	17.653	0.651447
	1445.62	82.997	12.05	33.142	9.489	1.26989
	1445.54	83.012	11.02	31.216	7.195	1.53162
	1445.46	83.026	12.88	27.987	5.775	2.2303
	1445.38	83.041	17.04	25.101	5.013	3.39916
	1445.29	83.055	21.25	21.295	5.139	4.13505
	1445.21	83.069	23.69	17.158	8.156	2.90461
	1445.12	83.084	26.22	12.286	16.157	1.62283
	1445.04	83.098	28.55	8.389	24.957	1.14397
	1444.96	83.11	28.37	5.848	25.737	1.1023
	1444.88	83.119	26.63	3.966	20.494	1.2994
	1444.79	83.129	24.59	2.503	12.984	1.89387
	1444.71	83.138	23.85	1.402	5.992	3.98031
	1444.62	83.147	22.69	0.79	2.097	10.8202
	1444.54	83.157	21.14	0.576	1.173	18.0222
	1444.46	83.166	24.02	0.587	1.119	21.4656
	1444.38	83.176	37.47	1.39	2.451	15.2876
	1444.29	83.185	49.06	3.414	6.866	7.14535
	1444.21	83.194	43.57	5.599	13.039	3.34151
	1444.12	83.204	33.83	7.625	18.428	1.83579
	1444.04	83.213	28.37	8.418	20.617	1.37605
	1443.96	83.225	26.08	7.13	17.693	1.47403
	1443.88	83.237	21.53	4.808	10.803	1.99296
	1443.79	83.25	17.92	2.879	6.219	2.88149
	1443.71	83.264	16.04	2.249	4.116	3.89699
	1443.62	83.276	16.82	3.105	3.666	4.58811
	1443.54	83.289	21.23	4.406	4.316	4.91891
	1443.46	83.303	25.8	7.562	6.383	4.04199
	1443.38	83.315	35.4	11.297	9.673	3.65967
	1443.29	83.328	47.44	13.305	12.203	3.88757
	1443.21	83.342	56.05	13.105	13.09	4.28189
	1443.12	83.354	59.07	11.399	13.185	4.48009
	1443.04	83.367	47.4	8.804	13.23	3.58277
	1442.96	83.38	37.42	6.227	13.02	2.87404
	1442.88	83.391	36.87	3.893	11.274	3.27036
	1442.79	83.403	40.32	2.181	7.888	5.11156
	1442.71	83.414	31.48	1.156	4.109	7.66123
	1442.62	83.426	18.16	0.72	1.42	12.7887
	1442.54	83.437	13.88	0.897	0.548	25.3285
	1442.46	83.449	13.92	1.709	1.006	13.837
	1442.38	83.46	13.32	3.43	3.321	4.01084
	1442.29	83.472	13.46	5.52	10.248	1.31343
	1442.21	83.483	18.72	7.19	23.12	0.809689
	1442.12	83.495	26.55	7.954	37.523	0.707566
	1442.04	83.506	29.76	8.215	44.612	0.667085
	1441.96	83.518	26.88	7.852	50.441	0.5329
	1441.88	83.531	10.3	6.962	47.796	0.215499
	1441.79	83.543	8.66	5.432	33.515	0.258392
	1441.71	83.556	7.9	3.575	18.185	0.434424
	1441.62	83.569	9.12	2.396	6.87	1.32751
	1441.54	83.581	12.86	2.058	2.77	4.6426
	1441.46	83.594	17.37	2.383	3.518	4.93746
	1441.38	83.606	20.26	2.904	5.663	3.57761
	1441.29	83.619	20.5	3.416	8.728	2.34876
	1441.21	83.632	17.73	3.732	12.994	1.36448
	1441.12	83.644	16.5	3.997	18.679	0.883345
	1441.04	83.657	18.11	4.179	24.788	0.730595
	1440.96	83.668	18.01	4.335	30.681	0.587008
	1440.88	83.677	15.24	4.328	35.267	0.432132
	1440.79	83.686	15.47	4.214	36.719	0.421308
	1440.71	83.695	17	4.071	34.445	0.49354
	1440.62	83.704	14.41	3.908	29.536	0.487879
	1440.54	83.713	11.8	3.957	23.838	0.495008
	1440.46	83.723	13.21	3.995	20.656	0.639524
	1440.38	83.732	13.63	3.95	21.394	0.637095
	1440.29	83.741	13.77	3.563	24.869	0.553701
	1440.21	83.75	14.14	3.027	27.576	0.512765
	1440.12	83.759	11.02	2.375	27.01	0.407997
	1440.04	83.768	10.91	1.761	24.963	0.437047

## Sheet: Table S10 - NEEMS1 Ann. Counts
	Table S10: 2 cm resolution non-sea-salt sulphur, calcium and sodium concentrations and non-sea-salt-sulphur/sodium ratios from the NEEM-2011-S1 ice-core between 1485-1445 CE (136.17-144.91 m depth). -0.999 denotes missing data. Used for Figure S3. Data from Sigl et al. (2013).
	Year (CE)	Depth (m)	Non-sea-salt sulphur (ng/g)	Calcium (ng/g)	Sodium (ng/g)	Non-sea-salt sulphur/sodium (nssS/Na)
	1485.33	136.17	20.0853	7.82317	5.75522	3.48992
	1485.21	136.19	21.326	8.88439	9.47202	2.25147
	1485.1	136.21	20.4138	8.56428	13.4625	1.51635
	1484.98	136.23	16.8965	6.77923	15.3856	1.0982
	1484.87	136.25	13.3402	4.93405	14.0056	0.95249
	1484.75	136.27	11.3483	3.6909	10.3499	1.09646
	1484.64	136.29	10.5279	2.9891	8.69138	1.2113
	1484.52	136.31	-0.999	-0.999	-0.999	-0.999
	1484.41	136.33	-0.999	-0.999	-0.999	-0.999
	1484.29	136.35	-0.999	-0.999	-0.999	-0.999
	1484.18	136.37	-0.999	-0.999	-0.999	-0.999
	1484.06	136.39	9.46935	2.44101	7.88996	1.20018
	1483.96	136.41	9.2745	2.13461	6.69928	1.3844
	1483.86	136.43	9.73367	2.10133	5.15309	1.8889
	1483.77	136.45	10.14	2.15208	2.65534	3.81871
	1483.67	136.47	10.0381	2.81551	0.605265	16.5846
	1483.58	136.49	11.3848	5.46887	0.805615	14.1318
	1483.49	136.51	14.1008	9.67619	1.44286	9.77283
	1483.39	136.53	15.4197	14.0729	2.3905	6.4504
	1483.3	136.55	14.0116	16.4277	3.89379	3.59845
	1483.2	136.57	14.3707	18.1385	8.68213	1.65521
	1483.11	136.59	19.7788	24.4048	20.0029	0.988797
	1483.01	136.61	22.2491	24.661	28.3217	0.785586
	1482.9	136.63	19.4497	20.2944	25.8683	0.751876
	1482.78	136.65	16.0321	11.471	20.0832	0.798283
	1482.67	136.67	13.3667	5.26649	11.6466	1.14769
	1482.55	136.69	11.8095	3.07746	4.30761	2.74155
	1482.43	136.71	12.0219	3.74112	1.5567	7.72271
	1482.31	136.73	12.107	6.74527	1.99427	6.07089
	1482.2	136.75	13.9806	10.1148	3.75895	3.71928
	1482.08	136.77	16.0692	12.4606	5.84893	2.74737
	1481.97	136.79	16.1474	13.0059	6.69698	2.41114
	1481.89	136.81	15.986	12.1206	6.13286	2.60661
	1481.81	136.83	15.4268	8.60124	4.62348	3.33663
	1481.72	136.85	16.5241	5.82711	4.23222	3.90435
	1481.64	136.87	17.118	4.40108	4.04686	4.22996
	1481.56	136.89	18.1321	3.35328	3.26668	5.55063
	1481.47	136.91	20.1897	2.81857	2.172	9.29546
	1481.39	136.93	23.82	3.51398	2.82981	8.41751
	1481.31	136.95	-0.999	-0.999	-0.999	-0.999
	1481.22	136.97	-0.999	-0.999	-0.999	-0.999
	1481.14	136.99	22.2181	4.48964	15.2377	1.45811
	1481.05	137.01	22.2118	3.96309	21.4027	1.03781
	1480.96	137.03	20.9179	3.65687	20.6979	1.01063
	1480.86	137.05	19.2795	3.52406	12.0134	1.60484
	1480.75	137.07	19.753	4.38176	6.84499	2.88577
	1480.64	137.09	20.4203	6.32609	4.28223	4.76863
	1480.54	137.11	20.8092	7.66192	3.04991	6.82289
	1480.43	137.13	19.4183	8.06211	3.62433	5.35775
	1480.33	137.15	21.2111	9.77213	4.72625	4.48794
	1480.22	137.17	27.8466	12.7832	9.19638	3.02799
	1480.12	137.19	35.4339	14.0964	13.8819	2.55253
	1480.01	137.21	36.2191	11.719	13.5809	2.6669
	1479.9	137.23	30.5422	7.86615	8.24998	3.70209
	1479.79	137.25	21.1193	4.4746	3.603	5.8616
	1479.68	137.27	16.4254	3.73913	2.23948	7.33447
	1479.58	137.29	15.6595	4.09246	2.84581	5.50263
	1479.47	137.31	17.2647	5.65523	5.38798	3.2043
	1479.36	137.33	19.7882	8.31845	10.3428	1.91322
	1479.25	137.35	20.0674	10.7653	18.4022	1.09049
	1479.14	137.37	16.3724	11.0298	25.5949	0.639674
	1479.04	137.39	13.1804	9.67735	25.0547	0.526066
	1478.94	137.41	11.137	6.65867	19.912	0.55931
	1478.86	137.43	10.7051	4.38904	12.2501	0.873878
	1478.77	137.45	11.8125	3.2287	7.42867	1.59012
	1478.68	137.47	13.8388	3.41037	7.00884	1.97447
	1478.6	137.49	14.6038	3.50574	6.28721	2.32278
	1478.51	137.51	14.7	3.00894	3.96353	3.70883
	1478.42	137.53	15.6011	2.23469	1.98922	7.84283
	1478.34	137.55	18.2874	2.06781	2.13732	8.55623
	1478.25	137.57	20.4786	2.92249	4.2961	4.76678
	1478.16	137.59	22.9488	5.10391	10.1448	2.26212
	1478.08	137.61	25.6899	7.29095	16.4094	1.56555
	1477.99	137.63	27.2378	7.08486	20.026	1.36012
	1477.88	137.65	25.9699	5.50147	17.8165	1.45763
	1477.77	137.67	23.6689	4.11224	11.4708	2.0634
	1477.66	137.69	21.4521	3.43807	6.21175	3.45348
	1477.55	137.71	23.5896	3.87488	6.32962	3.72686
	1477.44	137.73	29.6995	5.20544	10.0402	2.95807
	1477.33	137.75	40.0233	7.48916	18.7377	2.13598
	1477.22	137.77	50.1163	9.51962	28.8607	1.73649
	1477.11	137.79	47.6462	8.68813	31.0723	1.5334
	1477.01	137.81	42.849	7.61007	29.2495	1.46495
	1476.91	137.83	33.8489	5.39846	20.6585	1.6385
	1476.82	137.85	23.0052	3.20385	11.5634	1.98948
	1476.73	137.87	17.4729	2.61331	6.48262	2.69534
	1476.65	137.89	14.6245	2.69033	3.46661	4.21869
	1476.56	137.91	15.059	3.43308	2.12836	7.07537
	1476.47	137.93	16.6968	5.03712	2.07949	8.02927
	1476.38	137.95	19.5033	6.98525	3.10458	6.2821
	1476.29	137.97	22.6326	8.86806	4.72058	4.79445
	1476.2	137.99	22.8669	9.0484	6.37254	3.58835
	1476.11	138.01	19.9643	7.84657	7.255	2.7518
	1476.02	138.03	15.5577	5.54039	7.0343	2.21169
	1475.93	138.05	12.3941	3.25467	6.32327	1.96007
	1475.84	138.07	11.5542	2.07684	5.58363	2.0693
	1475.74	138.09	10.8774	2.08246	4.51638	2.40844
	1475.65	138.11	9.84067	2.55481	3.02598	3.25206
	1475.56	138.13	8.9033	3.75004	1.83138	4.86152
	1475.47	138.15	8.88545	5.77279	1.96866	4.51346
	1475.37	138.17	10.2604	8.83365	3.34483	3.06753
	1475.28	138.19	12.2619	12.3596	6.41576	1.91122
	1475.19	138.21	13.8296	13.7987	11.0564	1.25082
	1475.1	138.23	13.8831	13.474	15.241	0.910906
	1475.01	138.25	13.8171	11.6356	15.6276	0.884143
	1474.91	138.27	12.0319	7.70701	15.1615	0.793586
	1474.83	138.29	11.023	5.28694	13.4079	0.822126
	1474.74	138.31	11.9149	4.68058	11.5663	1.03014
	1474.65	138.33	11.9307	4.79521	8.70639	1.37034
	1474.56	138.35	10.6151	5.11326	4.2907	2.47399
	1474.47	138.37	10.7477	5.82942	2.72925	3.93795
	1474.38	138.39	11.5252	7.48772	3.47685	3.31483
	1474.29	138.41	12.8601	9.58225	4.43652	2.89868
	1474.2	138.43	13.7703	10.9657	6.1701	2.23178
	1474.11	138.45	12.5541	10.4157	9.55704	1.3136
	1474.02	138.47	10.5397	7.26806	15.4902	0.68041
	1473.92	138.49	8.97958	3.47143	14.4801	0.620131
	1473.83	138.51	8.4688	1.86695	8.76106	0.966641
	1473.73	138.53	8.88023	1.60842	3.51517	2.52626
	1473.64	138.55	9.94855	1.77147	1.21701	8.17456
	1473.54	138.57	10.5053	2.62514	1.35044	7.77915
	1473.44	138.59	11.8016	4.43498	2.38015	4.95834
	1473.35	138.61	13.7083	6.83932	4.50176	3.04509
	1473.25	138.63	14.4568	8.63892	8.71721	1.65842
	1473.16	138.65	13.8706	8.66316	12.2978	1.12789
	1473.06	138.67	-0.999	-0.999	-0.999	-0.999
	1472.95	138.69	11.0404	2.996	16.5722	0.666202
	1472.82	138.71	10.2605	2.55042	13.2118	0.776615
	1472.69	138.73	-0.999	-0.999	-0.999	-0.999
	1472.56	138.75	10.9979	3.74738	2.85403	3.85348
	1472.43	138.77	13.3374	5.4386	5.32092	2.5066
	1472.3	138.79	13.9346	5.85733	9.10746	1.53003
	1472.17	138.81	11.3003	4.64652	10.1511	1.1132
	1472.04	138.83	8.40026	2.85518	7.76222	1.0822
	1471.92	138.85	7.3071	1.95552	5.01729	1.45638
	1471.8	138.87	7.20381	1.72502	3.30654	2.17865
	1471.69	138.89	7.48655	1.78699	2.16333	3.46066
	1471.58	138.91	7.81795	2.02634	1.38484	5.64538
	1471.46	138.93	8.94869	3.83626	1.94749	4.59497
	1471.35	138.95	11.8433	7.43302	4.15494	2.85042
	1471.24	138.97	15.5378	11.1836	7.67786	2.02371
	1471.12	138.99	17.1426	12.0771	10.4819	1.63545
	1471.01	139.01	17.8895	11.3192	12.1837	1.46831
	1470.93	139.03	20.1689	10.0775	12.9413	1.55849
	1470.84	139.05	22.1061	7.17847	9.57096	2.3097
	1470.76	139.07	25.8833	4.69873	3.65209	7.08726
	1470.68	139.09	29.7983	4.16406	1.76158	16.9157
	1470.6	139.11	36.6177	5.23647	1.88285	19.4481
	1470.51	139.13	42.3042	7.21797	2.82699	14.9644
	1470.43	139.15	39.2932	9.23631	4.34995	9.03302
	1470.35	139.17	28.8983	11.6204	6.94488	4.1611
	1470.27	139.19	18.729	13.1145	10.9901	1.70417
	1470.18	139.21	15.4704	11.143	17.9716	0.860821
	1470.1	139.23	14.2594	7.93471	20.0702	0.710476
	1470.02	139.25	13.8583	5.55689	16.6793	0.830869
	1469.93	139.27	13.6757	3.86664	10.9496	1.24897
	1469.84	139.29	12.9431	2.8249	6.21928	2.08112
	1469.75	139.31	11.4681	2.17781	3.07335	3.73147
	1469.66	139.33	11.3932	1.67912	1.79417	6.35011
	1469.56	139.35	11.9716	1.55591	1.19369	10.0291
	1469.47	139.37	13.6721	2.06015	1.43824	9.50614
	1469.38	139.39	16.2506	3.67802	2.53348	6.41433
	1469.29	139.41	18.1526	6.98052	5.07392	3.57763
	1469.2	139.43	18.1717	12.1842	10.7282	1.69382
	1469.11	139.45	18.3475	16.1999	16.2774	1.12717
	1469.02	139.47	18.6681	16.5324	17.4713	1.0685
	1468.92	139.49	18.8641	14.1537	15.3389	1.22982
	1468.83	139.51	15.4175	9.77809	12.0059	1.28416
	1468.73	139.53	12.7652	5.8776	8.47677	1.5059
	1468.64	139.55	-0.999	-0.999	-0.999	-0.999
	1468.54	139.57	-0.999	-0.999	-0.999	-0.999
	1468.45	139.59	15.5932	7.95397	3.90352	3.99465
	1468.35	139.61	17.7075	10.856	5.61448	3.15391
	1468.26	139.63	19.8578	14.0844	8.30531	2.39098
	1468.17	139.65	19.954	15.5384	10.0902	1.97757
	1468.07	139.67	17.6178	15.394	10.6057	1.66116
	1467.98	139.69	13.1625	11.2585	8.98796	1.46446
	1467.89	139.71	10.1777	7.22854	7.41732	1.37215
	1467.81	139.73	9.99287	5.42266	6.63384	1.50635
	1467.72	139.75	11.0322	4.21177	6.12746	1.80046
	1467.63	139.77	12.1963	3.53378	5.26152	2.31802
	1467.55	139.79	12.6646	3.36689	3.08769	4.10164
	1467.46	139.81	14.1456	3.7837	2.03329	6.95702
	1467.37	139.83	15.959	4.98069	2.32102	6.87586
	1467.29	139.85	17.8808	6.60994	4.65511	3.8411
	1467.2	139.87	17.4523	7.62692	11.4523	1.52391
	1467.12	139.89	15.2142	8.21186	18.4828	0.823154
	1467.03	139.91	13.5253	7.05539	17.4884	0.773387
	1466.92	139.93	12.6891	5.31613	14.1072	0.899479
	1466.81	139.95	-0.999	-0.999	-0.999	-0.999
	1466.69	139.97	12.4505	2.53462	4.28874	2.90307
	1466.57	139.99	12.6616	4.08438	2.87641	4.40188
	1466.46	140.01	15.1455	8.69608	4.04176	3.74725
	1466.34	140.03	19.315	14.3023	7.42555	2.60115
	1466.23	140.05	20.7664	17.6227	13.9064	1.4933
	1466.11	140.07	15.4023	14.1395	21.5443	0.714911
	1466	140.09	10.1934	7.55445	21.5201	0.473666
	1465.9	140.11	10.0765	3.53557	10.9659	0.918897
	1465.8	140.13	10.3993	2.53066	4.26654	2.43741
	1465.7	140.15	10.5566	2.70194	2.75249	3.83527
	1465.6	140.17	10.843	2.6937	2.26463	4.78799
	1465.5	140.19	10.5661	2.48496	1.74656	6.04966
	1465.4	140.21	9.77891	3.00404	1.71138	5.71404
	1465.3	140.23	9.74738	4.84154	2.58435	3.77169
	1465.2	140.25	-0.999	-0.999	-0.999	-0.999
	1465.1	140.27	14.8006	17.1551	11.3072	1.30896
	1465	140.29	14.6663	17.2458	13.3084	1.10203
	1464.9	140.31	12.7141	13.606	10.7102	1.1871
	1464.81	140.33	10.1747	7.52934	5.58331	1.82234
	1464.71	140.35	8.94834	3.58084	4.78017	1.87197
	1464.62	140.37	9.23397	2.29065	5.09481	1.81243
	1464.52	140.39	10.5312	2.1044	3.8292	2.75023
	1464.43	140.41	12.4561	2.93812	2.4676	5.04786
	1464.33	140.43	15.159	5.25952	2.45772	6.16791
	1464.24	140.45	17.9456	9.36789	4.12355	4.35199
	1464.14	140.47	17.3645	13.671	6.76098	2.56835
	1464.05	140.49	16.0304	15.03	9.04303	1.77268
	1463.96	140.51	13.3306	9.26463	6.91544	1.92766
	1463.88	140.53	9.90695	3.08559	3.56798	2.77663
	1463.8	140.55	11.0527	1.41071	2.22332	4.97127
	1463.73	140.57	-0.999	-0.999	-0.999	-0.999
	1463.65	140.59	11.3664	0.630423	0.227257	50.0156
	1463.57	140.61	14.3215	0.824977	0.257432	55.6323
	1463.49	140.63	20.0877	1.78415	0.714766	28.1039
	1463.41	140.65	25.153	3.7728	1.92909	13.0388
	1463.34	140.67	26.3546	7.36837	3.25065	8.10749
	1463.26	140.69	25.8202	11.3001	5.33161	4.84286
	1463.18	140.71	21.8147	13.8543	9.12724	2.39006
	1463.1	140.73	15.7341	14.704	14.0486	1.11997
	1463.02	140.75	12.3011	15.2323	17.3862	0.707524
	1462.94	140.77	11.4065	11.3585	16.3562	0.697384
	1462.85	140.79	10.8682	8.66592	8.66188	1.25472
	1462.76	140.81	10.7447	2.59254	2.38718	4.50101
	1462.67	140.83	10.1892	1.62693	0.694342	14.6746
	1462.58	140.85	8.51867	1.22324	0.410964	20.7285
	1462.49	140.87	7.14432	1.27087	0.520908	13.7151
	1462.41	140.89	8.8014	2.75218	1.28531	6.84768
	1462.32	140.91	11.3999	5.26934	2.29628	4.96451
	1462.23	140.93	11.243	6.96671	4.5405	2.47616
	1462.14	140.95	9.32985	6.11076	7.47539	1.24807
	1462.05	140.97	9.1302	5.59475	15.0497	0.60667
	1461.93	140.99	10.0359	4.79017	21.1232	0.475111
	1461.77	141.01	11.6671	3.39858	13.3374	0.87476
	1461.61	141.03	14.4772	2.14071	3.69732	3.91559
	1461.44	141.05	21.4619	2.83561	4.97648	4.31267
	1461.28	141.07	31.2036	4.97504	16.4521	1.89663
	1461.12	141.09	40.5435	7.04981	23.6305	1.71572
	1460.97	141.11	40.3287	6.75972	19.1574	2.10513
	1460.89	141.13	32.1737	3.69568	12.1098	2.65683
	1460.8	141.15	26.8795	1.90684	6.34286	4.23776
	1460.71	141.17	25.1214	1.45031	4.5762	5.48957
	1460.63	141.19	26.4734	1.37969	3.27649	8.07982
	1460.54	141.21	30.225	1.16949	1.94789	15.5168
	1460.45	141.23	32.9419	1.26641	2.1242	15.5079
	1460.36	141.25	34.4332	2.24765	2.96153	11.6268
	1460.28	141.27	33.8857	3.8305	6.68401	5.06968
	1460.19	141.29	36.2282	5.5361	17.3355	2.08983
	1460.1	141.31	44.5552	7.33574	35.6717	1.24903
	1460.02	141.33	50.0722	8.71978	49.1029	1.01974
	1459.95	141.35	45.3016	8.01017	42.1709	1.07424
	1459.88	141.37	40.2378	5.09587	26.1467	1.53892
	1459.82	141.39	40.949	2.56774	11.783	3.47527
	1459.75	141.41	38.8084	1.45664	4.77388	8.12932
	1459.69	141.43	32.3144	0.701567	2.51228	12.8626
	1459.62	141.45	27.6822	0.293234	0.817288	33.8708
	1459.56	141.47	26.5495	0.282421	0.29246	90.78
	1459.49	141.49	28.73	0.425389	0.270852	106.073
	1459.43	141.51	34.9688	0.643263	0.298758	117.047
	1459.36	141.53	41.0357	1.30511	0.548568	74.8051
	1459.3	141.55	40.6282	2.20817	1.23696	32.8453
	1459.23	141.57	35.5735	4.52329	3.81819	9.31685
	1459.16	141.59	25.3	7.31733	9.17772	2.75667
	1459.1	141.61	17.07	8.12006	17.8524	0.956175
	1459.04	141.63	11.3662	7.09805	28.9416	0.392726
	1458.96	141.65	9.38227	5.59515	23.7033	0.395822
	1458.89	141.67	7.10054	3.14315	7.60573	0.933578
	1458.81	141.69	5.81021	1.14749	1.47327	3.94376
	1458.73	141.71	6.11295	1.15841	1.05679	5.78445
	1458.66	141.73	7.52375	1.61918	0.846243	8.89077
	1458.58	141.75	9.91404	2.6468	1.09525	9.05185
	1458.5	141.77	10.8857	4.5984	1.71352	6.35283
	1458.42	141.79	10.4603	6.82169	3.33156	3.13977
	1458.35	141.81	10.2411	8.14926	5.51184	1.85801
	1458.27	141.83	9.99247	8.97216	8.3647	1.1946
	1458.19	141.85	8.74744	8.27757	11.8804	0.73629
	1458.11	141.87	7.94482	8.07316	14.7452	0.538808
	1458.04	141.89	-0.999	-0.999	-0.999	-0.999
	1457.96	141.91	9.96435	9.1023	16.4113	0.607165
	1457.88	141.93	9.76548	7.7429	19.5871	0.498568
	1457.8	141.95	10.6265	4.89629	14.2635	0.745012
	1457.72	141.97	11.8329	3.19943	5.55929	2.12848
	1457.64	141.99	11.3743	2.29857	2.86291	3.97298
	1457.56	142.01	9.41557	2.26111	1.72093	5.4712
	1457.48	142.03	9.54295	3.06329	1.84434	5.17418
	1457.4	142.05	11.2142	5.05105	2.38493	4.70211
	1457.32	142.07	13.6099	8.2631	3.65109	3.72764
	1457.24	142.09	13.1073	9.24095	4.51612	2.90233
	1457.16	142.11	13.0185	8.8888	5.87195	2.21706
	1457.08	142.13	14.9272	7.17472	9.22113	1.6188
	1457	142.15	18.9071	6.43838	10.8695	1.73946
	1456.93	142.17	20.633	4.70711	8.09943	2.54746
	1456.86	142.19	18.9133	3.59943	6.95166	2.72069
	1456.78	142.21	16.1116	3.38638	7.78923	2.06845
	1456.71	142.23	15.7753	2.96486	7.69032	2.05132
	1456.64	142.25	17.6189	2.81397	5.6723	3.10613
	1456.57	142.27	19.1488	3.12086	4.33119	4.42113
	1456.49	142.29	19.3192	4.9407	3.44265	5.61171
	1456.42	142.31	17.6562	9.46627	2.36569	7.46343
	1456.35	142.33	19.2737	15.5838	2.74663	7.01723
	1456.27	142.35	17.68	14.7483	2.7467	6.4368
	1456.2	142.37	9.56319	9.09773	2.38918	4.0027
	1456.13	142.39	-0.999	-0.999	-0.999	-0.999
	1456.06	142.41	9.33612	9.47939	5.05799	1.84582
	1455.98	142.43	9.67184	9.25363	4.49385	2.15224
	1455.88	142.45	-0.999	-0.999	-0.999	-0.999
	1455.78	142.47	10.2666	2.1753	1.7649	5.81712
	1455.68	142.49	10.7168	2.39852	1.68188	6.37193
	1455.58	142.51	11.1287	2.77047	1.83393	6.06825
	1455.48	142.53	11.7794	3.63086	2.49239	4.72616
	1455.38	142.55	11.2221	4.16222	3.64858	3.07574
	1455.28	142.57	10.7988	5.32421	6.92434	1.55954
	1455.18	142.59	11.7033	6.9434	12.5307	0.933971
	1455.08	142.61	13.3129	7.59995	18.155	0.733294
	1454.99	142.63	15.302	7.89196	20.9919	0.728945
	1454.93	142.65	16.1466	7.04688	20.2827	0.796076
	1454.86	142.67	16.7169	5.50952	17.5397	0.953092
	1454.8	142.69	16.0012	3.67288	11.7861	1.35763
	1454.74	142.71	14.44	1.81766	4.36016	3.31181
	1454.68	142.73	14.2841	0.927284	1.59139	8.97588
	1454.62	142.75	14.749	0.764565	0.964518	15.2916
	1454.55	142.77	16.7329	0.794141	0.60375	27.715
	1454.49	142.79	19.6385	0.954988	0.606888	32.3593
	1454.43	142.81	18.9912	1.10575	0.585304	32.4467
	1454.37	142.83	17.4227	1.44617	0.556966	31.2814
	1454.31	142.85	16.6251	2.22691	0.813407	20.4388
	1454.25	142.87	20.8662	4.43912	2.56518	8.13442
	1454.18	142.89	29.3137	8.84344	7.21246	4.06431
	1454.12	142.91	36.1379	13.6509	12.9407	2.79257
	1454.06	142.93	38.0948	15.4764	16.902	2.25386
	1453.99	142.95	35.2425	12.8512	17.6643	1.99512
	1453.89	142.97	31.351	7.60517	13.5267	2.31771
	1453.79	142.99	28.4968	3.19978	6.15987	4.6262
	1453.69	143.01	29.2196	2.0964	2.15745	13.5436
	1453.59	143.03	34.7863	2.82157	2.03676	17.0792
	1453.48	143.05	40.6495	5.85494	4.611	8.81577
	1453.38	143.07	43.3535	10.898	9.41677	4.60386
	1453.28	143.09	38.0607	12.4291	12.5334	3.03675
	1453.18	143.11	28.1061	9.9487	11.6428	2.41404
	1453.08	143.13	19.1942	6.48084	8.12469	2.36246
	1452.98	143.15	14.4685	3.98007	5.35771	2.70051
	1452.91	143.17	14.0414	3.51882	4.22597	3.32264
	1452.84	143.19	14.0657	3.35688	2.9032	4.84489
	1452.76	143.21	14.0817	2.98149	1.74468	8.07123
	1452.69	143.23	13.6309	2.40934	1.10939	12.2868
	1452.62	143.25	11.6802	1.93138	1.26116	9.26149
	1452.55	143.27	8.32639	1.40221	1.55291	5.3618
	1452.48	143.29	8.18462	1.81588	1.58008	5.17988
	1452.41	143.31	9.23732	3.11589	1.71828	5.37591
	1452.33	143.33	10.5714	5.20585	2.61408	4.04403
	1452.26	143.35	11.4551	7.25072	4.54058	2.52283
	1452.19	143.37	10.7628	7.73737	6.29764	1.70903
	1452.12	143.39	9.39853	6.09654	8.28776	1.13402
	1452.05	143.41	9.74327	4.83404	7.38446	1.31943
	1451.97	143.43	-0.999	-0.999	-0.999	-0.999
	1451.88	143.45	11.3024	3.59793	7.44393	1.51834
	1451.8	143.47	12.2164	4.51109	6.07697	2.01028
	1451.71	143.49	13.2976	5.55468	4.91528	2.70536
	1451.63	143.51	12.4218	5.06692	3.30667	3.7566
	1451.54	143.53	10.8483	3.44325	2.13557	5.07982
	1451.46	143.55	10.3357	2.77701	1.85547	5.57037
	1451.37	143.57	9.85456	3.76792	2.76145	3.56862
	1451.29	143.59	10.2655	6.17693	4.97087	2.06514
	1451.2	143.61	11.5824	8.23859	8.39065	1.3804
	1451.11	143.63	12.1965	9.18464	11.8662	1.02784
	1451.03	143.65	12.3836	9.27325	13.9189	0.889697
	1450.93	143.67	12.462	8.10382	13.7423	0.90683
	1450.83	143.69	11.7574	5.68862	10.2508	1.14696
	1450.73	143.71	11.2448	3.59781	5.99661	1.87519
	1450.62	143.73	11.1305	2.5001	3.61767	3.07672
	1450.52	143.75	11.2251	2.31914	4.12953	2.71824
	1450.42	143.77	11.7866	3.37127	8.38558	1.40558
	1450.32	143.79	11.8397	4.67872	15.2669	0.775515
	1450.21	143.81	11.7886	5.47006	21.9148	0.537928
	1450.11	143.83	12.8258	5.52909	27.883	0.459988
	1450.01	143.85	15.7149	5.05705	27.6027	0.569326
	1449.89	143.87	18.1836	4.89354	18.0385	1.00804
	1449.76	143.89	19.8505	4.86185	8.88327	2.23459
	1449.64	143.91	19.4405	5.54483	5.9009	3.29449
	1449.52	143.93	17.1381	7.20559	8.05358	2.12801
	1449.39	143.95	14.8181	8.89024	12.71	1.16586
	1449.27	143.97	12.6486	8.55278	18.283	0.691822
	1449.15	143.99	10.9559	7.42175	21.574	0.507831
	1449.03	144.01	11.1619	5.33156	22.0601	0.505976
	1448.92	144.03	12.1596	3.39574	18.0758	0.6727
	1448.81	144.05	13.901	3.1471	11.5866	1.19975
	1448.7	144.07	15.2783	3.68439	5.624	2.71663
	1448.6	144.09	15.2633	4.7656	2.684	5.68678
	1448.49	144.11	14.9969	6.20482	3.31325	4.52633
	1448.39	144.13	14.2299	8.09187	6.37582	2.23186
	1448.28	144.15	13.844	8.49821	10.3097	1.34282
	1448.18	144.17	12.7134	8.3806	13.8149	0.920268
	1448.07	144.19	11.3707	7.58821	14.9251	0.76185
	1447.97	144.21	10.5317	6.56188	13.8938	0.758013
	1447.88	144.23	9.07145	5.10961	9.99452	0.907643
	1447.78	144.25	8.65632	4.45267	5.60354	1.54479
	1447.69	144.27	9.11575	4.56377	3.16468	2.88047
	1447.6	144.29	10.2766	5.69492	2.15685	4.76462
	1447.5	144.31	12.5846	7.95043	2.75209	4.57275
	1447.41	144.33	15.237	10.9067	4.54509	3.3524
	1447.32	144.35	17.4544	12.9278	6.79758	2.56774
	1447.22	144.37	17.8351	13.6995	9.32275	1.91308
	1447.13	144.39	16.0035	11.8512	11.4739	1.39477
	1447.04	144.41	12.8201	8.13553	11.9887	1.06934
	1446.95	144.43	10.132	4.98452	11.0386	0.917867
	1446.87	144.45	9.33317	3.43267	9.25663	1.00827
	1446.79	144.47	9.7114	3.07115	7.91246	1.22736
	1446.72	144.49	-0.999	-0.999	-0.999	-0.999
	1446.64	144.51	10.2888	2.21338	2.77478	3.70797
	1446.56	144.53	10.5229	2.10787	1.57197	6.6941
	1446.48	144.55	9.90784	2.0782	0.97852	10.1253
	1446.4	144.57	9.53781	2.23607	1.17945	8.08669
	1446.32	144.59	10.3143	2.70524	1.82249	5.65944
	1446.25	144.61	12.4813	3.48267	3.8484	3.24324
	1446.17	144.63	15.8116	4.1201	7.71451	2.04959
	1446.09	144.65	20.089	4.34415	11.6042	1.73119
	1446.01	144.67	23.0333	4.1789	13.0976	1.75859
	1445.92	144.69	22.4852	3.25212	10.9398	2.05535
	1445.84	144.71	20.1646	2.237	7.38609	2.73008
	1445.75	144.73	16.7284	1.67997	4.08193	4.09816
	1445.66	144.75	14.1579	1.65855	1.94623	7.27451
	1445.57	144.77	13.8563	2.32917	1.39539	9.93002
	1445.49	144.79	14.0782	3.30504	1.46079	9.63741
	1445.4	144.81	15.6073	5.225	2.14124	7.28892
	1445.31	144.83	15.6479	6.9551	3.15319	4.96258
	1445.22	144.85	15.8566	7.70538	4.39822	3.60523
	1445.14	144.87	16.4327	8.07582	6.11913	2.68546
	1445.05	144.89	15.2366	6.48429	6.93378	2.19744
	1444.96	144.91	14.1528	4.39555	7.01189	2.01841
